# Supplementary material for: Amidinoquinoxaline N-oxides: synthesis and activity against anaerobic bacteria
Source: Royal Society of Chemistry journal article supplement (doi:10.1039/d3ra01184d), 2023-01-01
Supplement: d3ra01184d1.pdf [file d3ra01184d1.pdf]

Supporting Information for

**Amidinoquinoxaline *N*-oxides: Synthesis and activity against anaerobic bacteria**

Nadia Gruber,<sup>a</sup> Liliana Fernández-Canigia,<sup>\*b</sup> Natalia B. Kilimciler,<sup>a</sup> Pierluigi Stipa,<sup>c</sup> Juan A. Bisceglia,<sup>a</sup>  
María B. García,<sup>a</sup> Daniel H. Gonzalez Maglio,<sup>b</sup> Mariela L. Paz,<sup>b</sup> Liliana R. Orelli<sup>\*a</sup>

<sup>a</sup>Universidad de Buenos Aires. CONICET. Química Orgánica II. Departamento de Ciencias Químicas. Facultad de Farmacia y Bioquímica. Junín 956, (1113) Buenos Aires, Argentina.

<sup>b</sup>Laboratorio de Microbiología, Hospital Alemán, Av. Pueyrredón 1640, (1118) Buenos Aires, Argentina

<sup>c</sup>SIMAU Departament - Chemistry Division, Università Politecnica delle Marche, Via Brecce Bianche 12, Ancona (I-60131), Italy.

<sup>d</sup>Universidad de Buenos Aires. Instituto de Estudios de la Inmunidad Humoral (IDEHU); Cátedra de Inmunología. Facultad de Farmacia y Bioquímica. Junín 956, (1113) Buenos Aires, Argentina.

|                                                                                                                                                                          |         |
|--------------------------------------------------------------------------------------------------------------------------------------------------------------------------|---------|
| Table S1: <i>In vitro</i> activity of amidinoquinoxaline <i>N</i> -oxides <b>1</b> , <b>2</b> against clinical isolates of relevant anaerobic species (complete version) | S2-S4   |
| Copies of <sup>1</sup> H and <sup>13</sup> C NMR spectra                                                                                                                 | S5-S19  |
| Copies of IR spectra                                                                                                                                                     | S20-S22 |
| Copies of HRMS spectra                                                                                                                                                   | S23-S26 |
| Copies of elemental analyses                                                                                                                                             | S27     |

**Table S1:** *In vitro* activity of amidinoquinoxaline *N*-oxides **1**, **2** against clinical isolates of relevant anaerobic species (complete version)

| Organism (n° of isolates) and compounds                               | MIC (µg/mL)   |                   |                   |
|-----------------------------------------------------------------------|---------------|-------------------|-------------------|
|                                                                       | Range         | MIC <sub>50</sub> | MIC <sub>90</sub> |
| <b>Gram negative bacilli</b>                                          |               |                   |                   |
| <i>Bacteroides</i>                                                    |               |                   |                   |
| <i>fragilis</i>                                                       |               |                   |                   |
| <b>1a</b> (19)                                                        | 0.125 - >32   | 0,5               | 1                 |
| <b>1b</b> (19)                                                        | 0.5 - >32     | 1                 | 2                 |
| <b>1c</b> (19)                                                        | ≤0.06 - 0.25  | ≤0.06             | ≤0.06             |
| <b>1d</b> (19)                                                        | 0.5 - >32     | 1                 | 2                 |
| <b>1e</b> (16)                                                        | 0.125 - 0.5   | 0.25              | 0.5               |
| <b>1f</b> (16)                                                        | ≤0.06 - 0.125 | ≤0.06             | ≤0.06             |
| <b>1g</b> (16)                                                        | 0.125 - 1     | 0.25              | 0.5               |
| <b>1h</b> (16)                                                        | 0.5 - 4       | 1                 | 4                 |
| <b>1i</b> (16)                                                        | ≤0.06 - 0.125 | ≤0.06             | ≤0.06             |
| <b>1j</b> (16)                                                        | ≤0.06 - 0.125 | ≤0.06             | 0.125             |
| <b>1k</b> (16)                                                        | ≤0.06 - 0.125 | ≤0.06             | ≤0.06             |
| <b>1l</b> (16)                                                        | ≤0.06 - 0.125 | ≤0.06             | ≤0.06             |
| <b>1m</b> (19)                                                        | 0.5 - 2       | 1                 | 2                 |
| <b>2a</b> (16)                                                        | 0.5 - 4       | 2                 | 2                 |
| <b>2b</b> (16)                                                        | 1-8           | 4                 | 8                 |
| <b>2c</b> (16)                                                        | 0.125 - 2     | 0.5               | 1                 |
| Mtz (16)                                                              | 0.25 - 1      | 0.5               | 1                 |
| Other                                                                 |               |                   |                   |
| <i>Bacteroides</i> spp.<br>and<br><i>Parabacteroides</i> <sup>a</sup> |               |                   |                   |
| <b>1a</b> (13)                                                        | 0.25 - 1      | 0.5               | 1                 |
| <b>1b</b> (13)                                                        | 0.5 - 2       | 1                 | 1                 |
| <b>1c</b> (13)                                                        | ≤0.06 - 0.125 | ≤0.06             | ≤0.06             |
| <b>1d</b> (13)                                                        | 0.5 - 2       | 1                 | 2                 |
| <b>1e</b> (13)                                                        | 0.125 - 1     | 0.25              | 0.5               |
| <b>1f</b> (13)                                                        | ≤0.06 - 0.125 | ≤0.06             | ≤0.06             |
| <b>1g</b> (13)                                                        | 0.25 - 1      | 0.25              | 0.5               |
| <b>1h</b> (13)                                                        | 1 - 4         | 1                 | 4                 |
| <b>1i</b> (13)                                                        | ≤0.06 - ≤0.06 | ≤0.06             | ≤0.06             |
| <b>1j</b> (13)                                                        | ≤0.06 - 0.125 | ≤0.06             | 0.125             |
| <b>1k</b> (13)                                                        | ≤0.06 - ≤0.06 | ≤0.06             | ≤0.06             |
| <b>1l</b> (13)                                                        | ≤0.06 - 0.125 | ≤0.06             | ≤0.06             |
| <b>1m</b> (13)                                                        | 0.5 - 2       | 1                 | 2                 |
| <b>2a</b> (13)                                                        | 1-4           | 2                 | 4                 |

| Organism (n° of isolates) and compounds | MIC ( $\mu\text{g/mL}$ ) |                   |                   |
|-----------------------------------------|--------------------------|-------------------|-------------------|
|                                         | Range                    | MIC <sub>50</sub> | MIC <sub>90</sub> |
| <b>2b</b> (13)                          | 2 - 8                    | 4                 | 8                 |
| <b>2c</b> (13)                          | 0.25 - 2                 | 0.25              | 1                 |
| Mtz (13)                                | 0.25 - 1                 | 1                 | 1                 |
| <i>Prevotella</i> spp.                  |                          |                   |                   |
| <b>1a</b> (21) <sup>b</sup>             | $\leq 0.06 - 1$          | 0.25              | 1                 |
| <b>1b</b> (21) <sup>b</sup>             | $\leq 0.06 - 1$          | 0.5               | 1                 |
| <b>1c</b> (21) <sup>b</sup>             | $\leq 0.06 - 0.125$      | $\leq 0.06$       | 0.125             |
| <b>1d</b> (21) <sup>b</sup>             | 0.125 - 2                | 0.5               | 1                 |
| <b>1e</b> (14) <sup>c</sup>             | 0.125-0.5                | 0.25              | 0.5               |
| <b>1f</b> (14) <sup>c</sup>             | $\leq 0.06 - 0.125$      | $\leq 0.06$       | 0.125             |
| <b>1g</b> (14) <sup>c</sup>             | $\leq 0.06 - 1$          | 0.125             | 0.5               |
| <b>1h</b> (14) <sup>c</sup>             | 0.5-4                    | 1                 | 4                 |
| <b>1i</b> (14) <sup>c</sup>             | $\leq 0.06 - \leq 0.06$  | $\leq 0.06$       | $\leq 0.06$       |
| <b>1j</b> (14) <sup>c</sup>             | $\leq 0.06 - \leq 0.06$  | $\leq 0.06$       | $\leq 0.06$       |
| <b>1k</b> (14) <sup>c</sup>             | $\leq 0.06 - \leq 0.06$  | $\leq 0.06$       | $\leq 0.06$       |
| <b>1l</b> (14) <sup>c</sup>             | $\leq 0.06 - 0.25$       | $\leq 0.06$       | $\leq 0.06$       |
| <b>1m</b> (21) <sup>b</sup>             | 0.125-0.5                | 0.5               | 0.5               |
| <b>2a</b> (14) <sup>c</sup>             | 1-8                      | 4                 | 8                 |
| <b>2b</b> (14) <sup>c</sup>             | 4-16                     | 4                 | 8                 |
| <b>2c</b> (14) <sup>c</sup>             | $\leq 0.06 - 2$          | 0.5               | 1                 |
| Mtz (21) <sup>b</sup>                   | 0.25-2                   | 0.5               | 1                 |
| <i>Fusobacterium nucleatum</i>          |                          |                   |                   |
| <b>1a</b> (7)                           | 0.125-1                  | 0.25              | 1                 |
| <b>1b</b> (7)                           | 0.25-1                   | 0.25              | 1                 |
| <b>1c</b> (7)                           | $\leq 0.06 - 0.125$      | $\leq 0.06$       | $\leq 0.06$       |
| <b>1d</b> (7)                           | 0.5-2                    | 0.5               | 2                 |
| <b>1e</b> (7)                           | 0.25-1                   | 0.25              | 0.25              |
| <b>1f</b> (7)                           | $\leq 0.06 - 0.25$       | 0.125             | 0.125             |
| <b>1g</b> (7)                           | $\leq 0.06 - 1$          | 0.25              | 0.5               |
| <b>1h</b> (7)                           | 0.5-4                    | 1                 | 4                 |
| <b>1i</b> (7)                           | $\leq 0.06 - 0.125$      | $\leq 0.06$       | 0.125             |
| <b>1j</b> (7)                           | $\leq 0.06 - 0.125$      | $\leq 0.06$       | 0.125             |
| <b>1k</b> (7)                           | $\leq 0.06 - \leq 0.06$  | $\leq 0.06$       | $\leq 0.06$       |
| <b>1l</b> (7)                           | $\leq 0.06 - 0.125$      | $\leq 0.06$       | $\leq 0.06$       |
| <b>1m</b> (7)                           | 0.25-0.5                 | 0.5               | 0.5               |
| <b>2a</b> (7)                           | 2-16                     | 4                 | 4                 |
| <b>2b</b> (7)                           | 4-16                     | 4                 | 8                 |
| <b>2c</b> (7)                           | 0.25-1                   | 0.25              | 1                 |
| Mtz (7)                                 | $\leq 0.06 - 0.25$       | $\leq 0.06$       | 0.25              |

| Organism (n° of isolates) and compounds | MIC (µg/mL)   |                   |                   |
|-----------------------------------------|---------------|-------------------|-------------------|
|                                         | Range         | MIC <sub>50</sub> | MIC <sub>90</sub> |
| <b>Gram positive bacilli</b>            |               |                   |                   |
| <i>Clostridium difficile</i>            |               |                   |                   |
| <b>1a</b> (9)                           | 2 - 4         | 2                 | 4                 |
| <b>1b</b> (9)                           | 8 - 16        | 8                 | 16                |
| <b>1c</b> (9)                           | ≤0.06 - 1     | 0.25              | 0.5               |
| <b>1d</b> (9)                           | 0.25 - 8      | 4                 | 8                 |
| <b>1e</b> (14)                          | 1 - 8         | 2                 | 8                 |
| <b>1f</b> (14)                          | 0.25 - 1      | 0.5               | 0.5               |
| <b>1g</b> (14)                          | 2 - 4         | 2                 | 2                 |
| <b>1h</b> (14)                          | 8 - 32        | 16                | 16                |
| <b>1i</b> (14)                          | 0.125 - 1     | 0.5               | 0.5               |
| <b>1j</b> (14)                          | 0.125 - 0.25  | 0.25              | 0.25              |
| <b>1k</b> (14)                          | ≤0.06 - ≤0.06 | ≤0.06             | ≤0.06             |
| <b>1l</b> (14)                          | 0.125 - 1     | 0.25              | 0.5               |
| <b>1m</b> (9)                           | 0.25 - 4      | 2                 | 4                 |
| <b>2a</b> (14)                          | 8 - 64        | 16                | 32                |
| <b>2b</b> (14)                          | 4 - 32        | 32                | 32                |
| <b>2c</b> (14)                          | 0.25 - 1      | 0.25              | 0.5               |
| Mtz (14)                                | ≤0.06 - 0.5   | 0.25              | 0.25              |
| <i>Clostridium perfringens</i>          |               |                   |                   |
| <b>1a</b> (10)                          | 4 - 32        | 8                 | 16                |
| <b>1b</b> (10)                          | 16 - 64       | 32                | 64                |
| <b>1c</b> (10)                          | 0.25 - 2      | 0.5               | 2                 |
| <b>1d</b> (10)                          | 4 - 64        | 16                | 32                |
| <b>1e</b> (10)                          | 1-16          | 4                 | 8                 |
| <b>1f</b> (10)                          | 0.25 - 1      | 0.5               | 1                 |
| <b>1g</b> (10)                          | 2-8           | 4                 | 8                 |
| <b>1h</b> (10)                          | 32 - >32      | >32               | >32               |
| <b>1i</b> (10)                          | 0.5 - 1       | 0.5               | 1                 |
| <b>1j</b> (10)                          | 0.25 - 1      | 0.5               | 1                 |
| <b>1k</b> (10)                          | ≤0.06 – 0.25  | ≤0.06             | 0.125             |
| <b>1l</b> (10)                          | 0.25 - 1      | 0.5               | 1                 |
| <b>1m</b> (10)                          | 4 - 64        | 16                | 32                |
| <b>2a</b> (10)                          | 16-32         | 32                | 32                |
| <b>2b</b> (10)                          | 16 - >32      | 32                | 32                |
| <b>2c</b> (10)                          | 0.125 - 2     | 0.25              | 1                 |
| Mtz (10)                                | 0.5 - 2       | 0.5               | 1                 |

<sup>a</sup> Includes 3 isolates of *Parabacteroides distasonis* and 10 corresponding to species of *Bacteroides*: 6 *Bacteroides thetaiotaomicron/ovatus*, 2 *Bacteroides uniformis*, 1 *Bacteroides vulgatus* and 1 *Bacteroides caccae*.

<sup>b</sup> Includes 16 isolates of *Prevotella intermedia/nigrescens*, 2 of *Prevotella oralis* group, 2 of *Prevotella buccae* and 1 of *Prevotella bivia*.

<sup>c</sup> Includes 5 isolates of *Prevotella intermedia/nigrescens*, 1 of *Prevotella corporis*, 1 of *Prevotella oralis* group, 1 of *Prevotella oralis*, 1 of *Prevotella baroniae*, 2 of *Prevotella buccae*, 2 of *Prevotella bivia* and 1 of *Prevotella dentalis*.

MTZ = metronidazole.

Copies of  $^1\text{H}$  and  $^{13}\text{C}$  NMR spectra

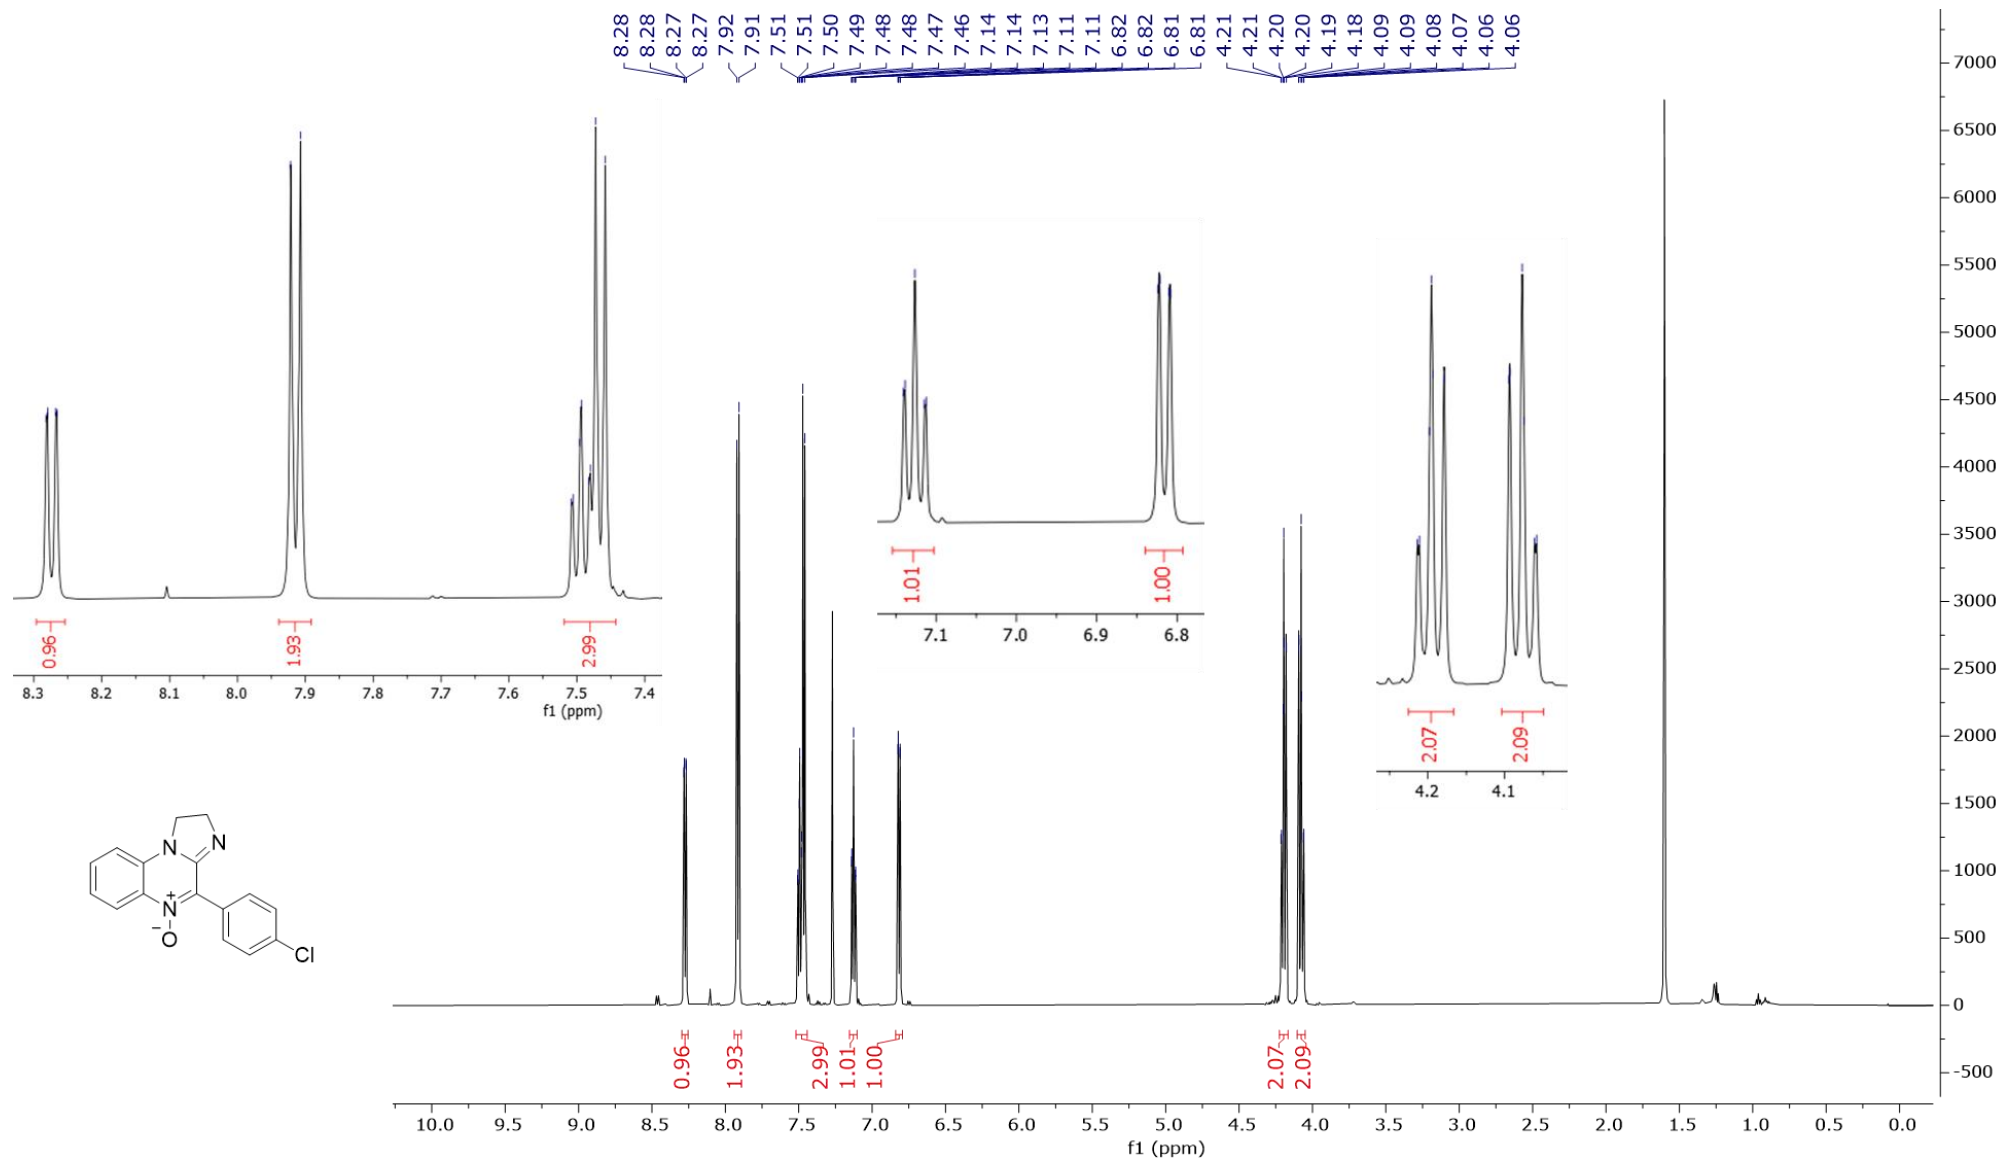

Figure S1:  $^1\text{H}$  NMR spectrum of compound **1j** (600 MHz,  $\text{CDCl}_3$ )

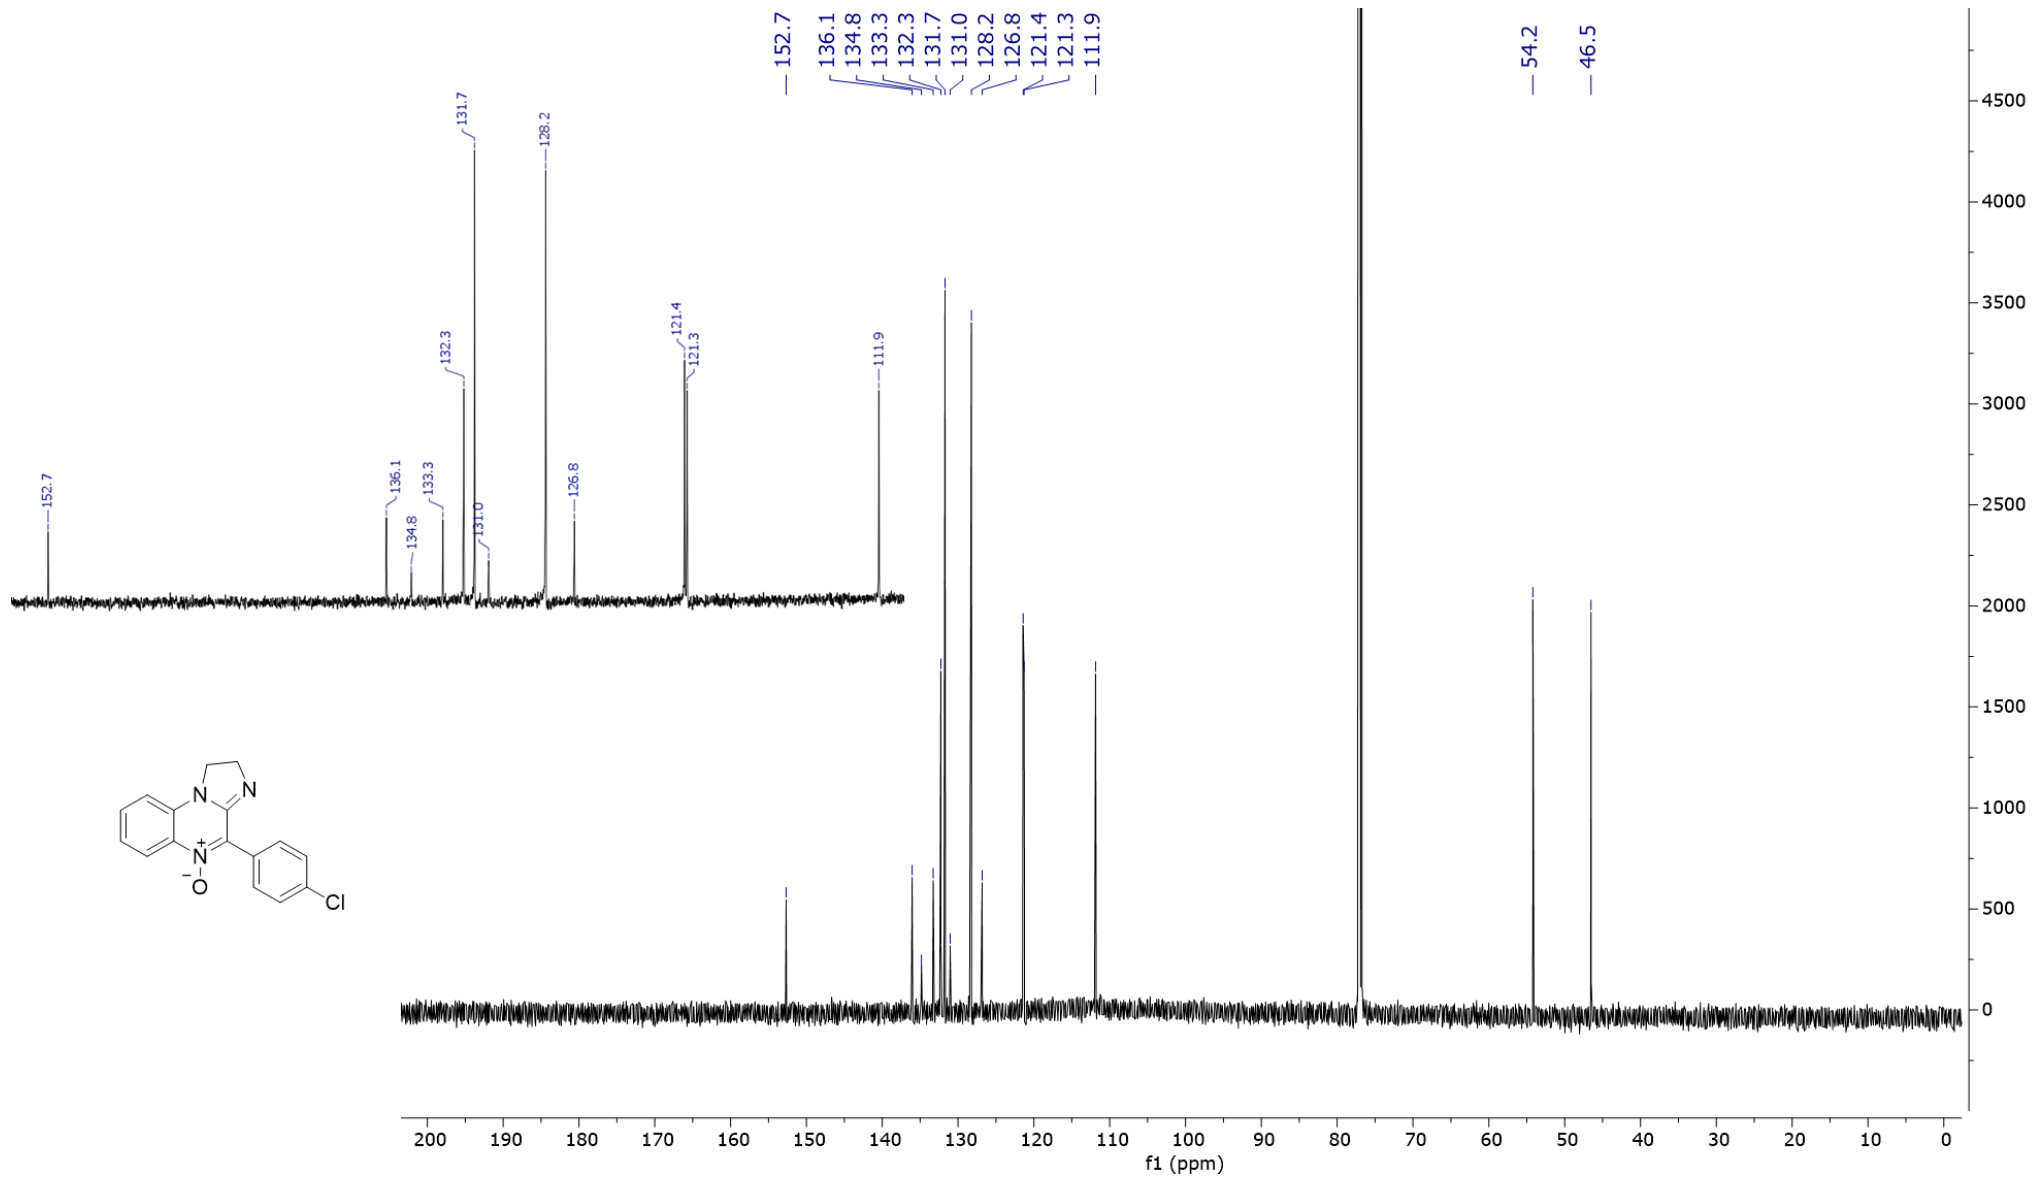

**Figure S2:**  $^{13}\text{C}$  NMR spectrum of compound **1j** (151 MHz,  $\text{CDCl}_3$ )

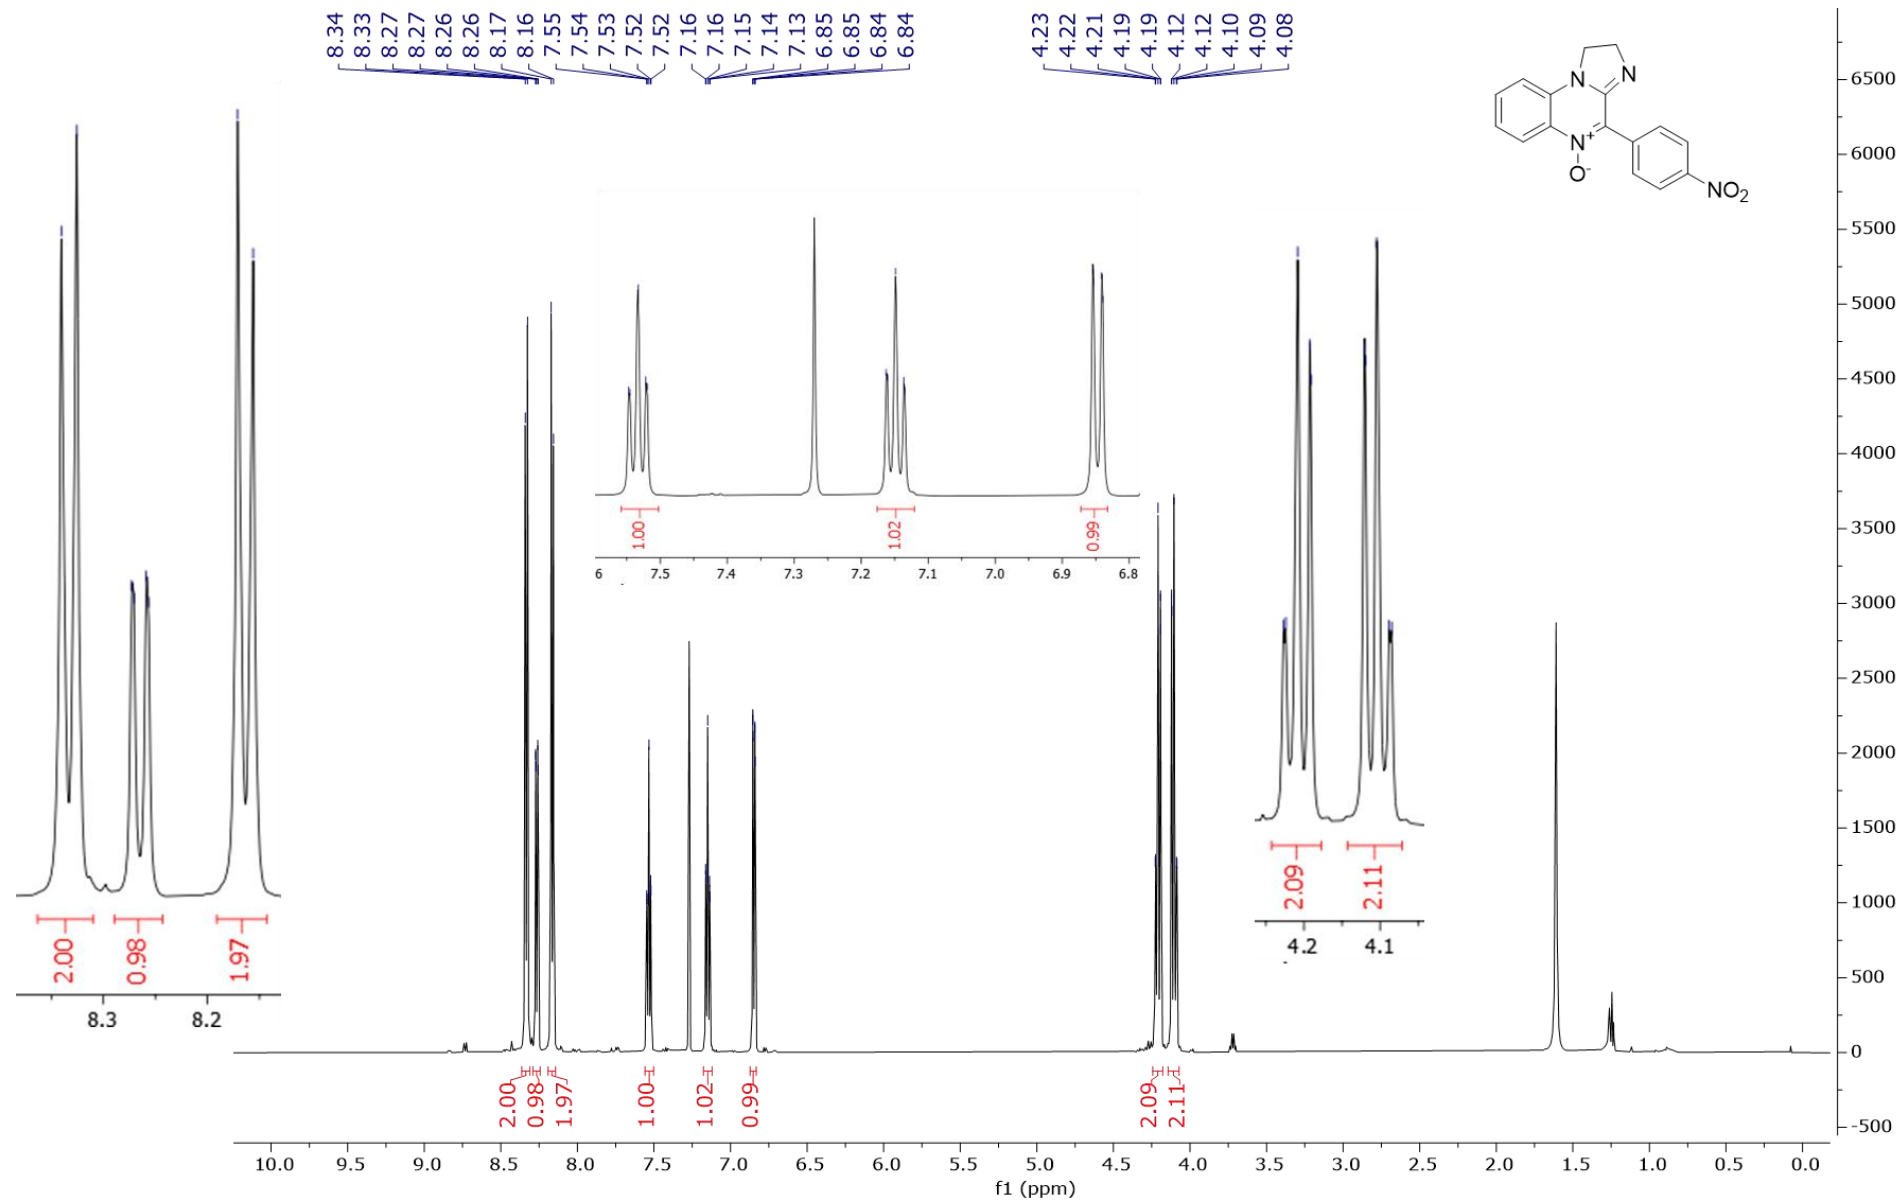

**Figure S3:** <sup>1</sup>H NMR spectrum of compound **1k** (600 MHz, CDCl<sub>3</sub>)



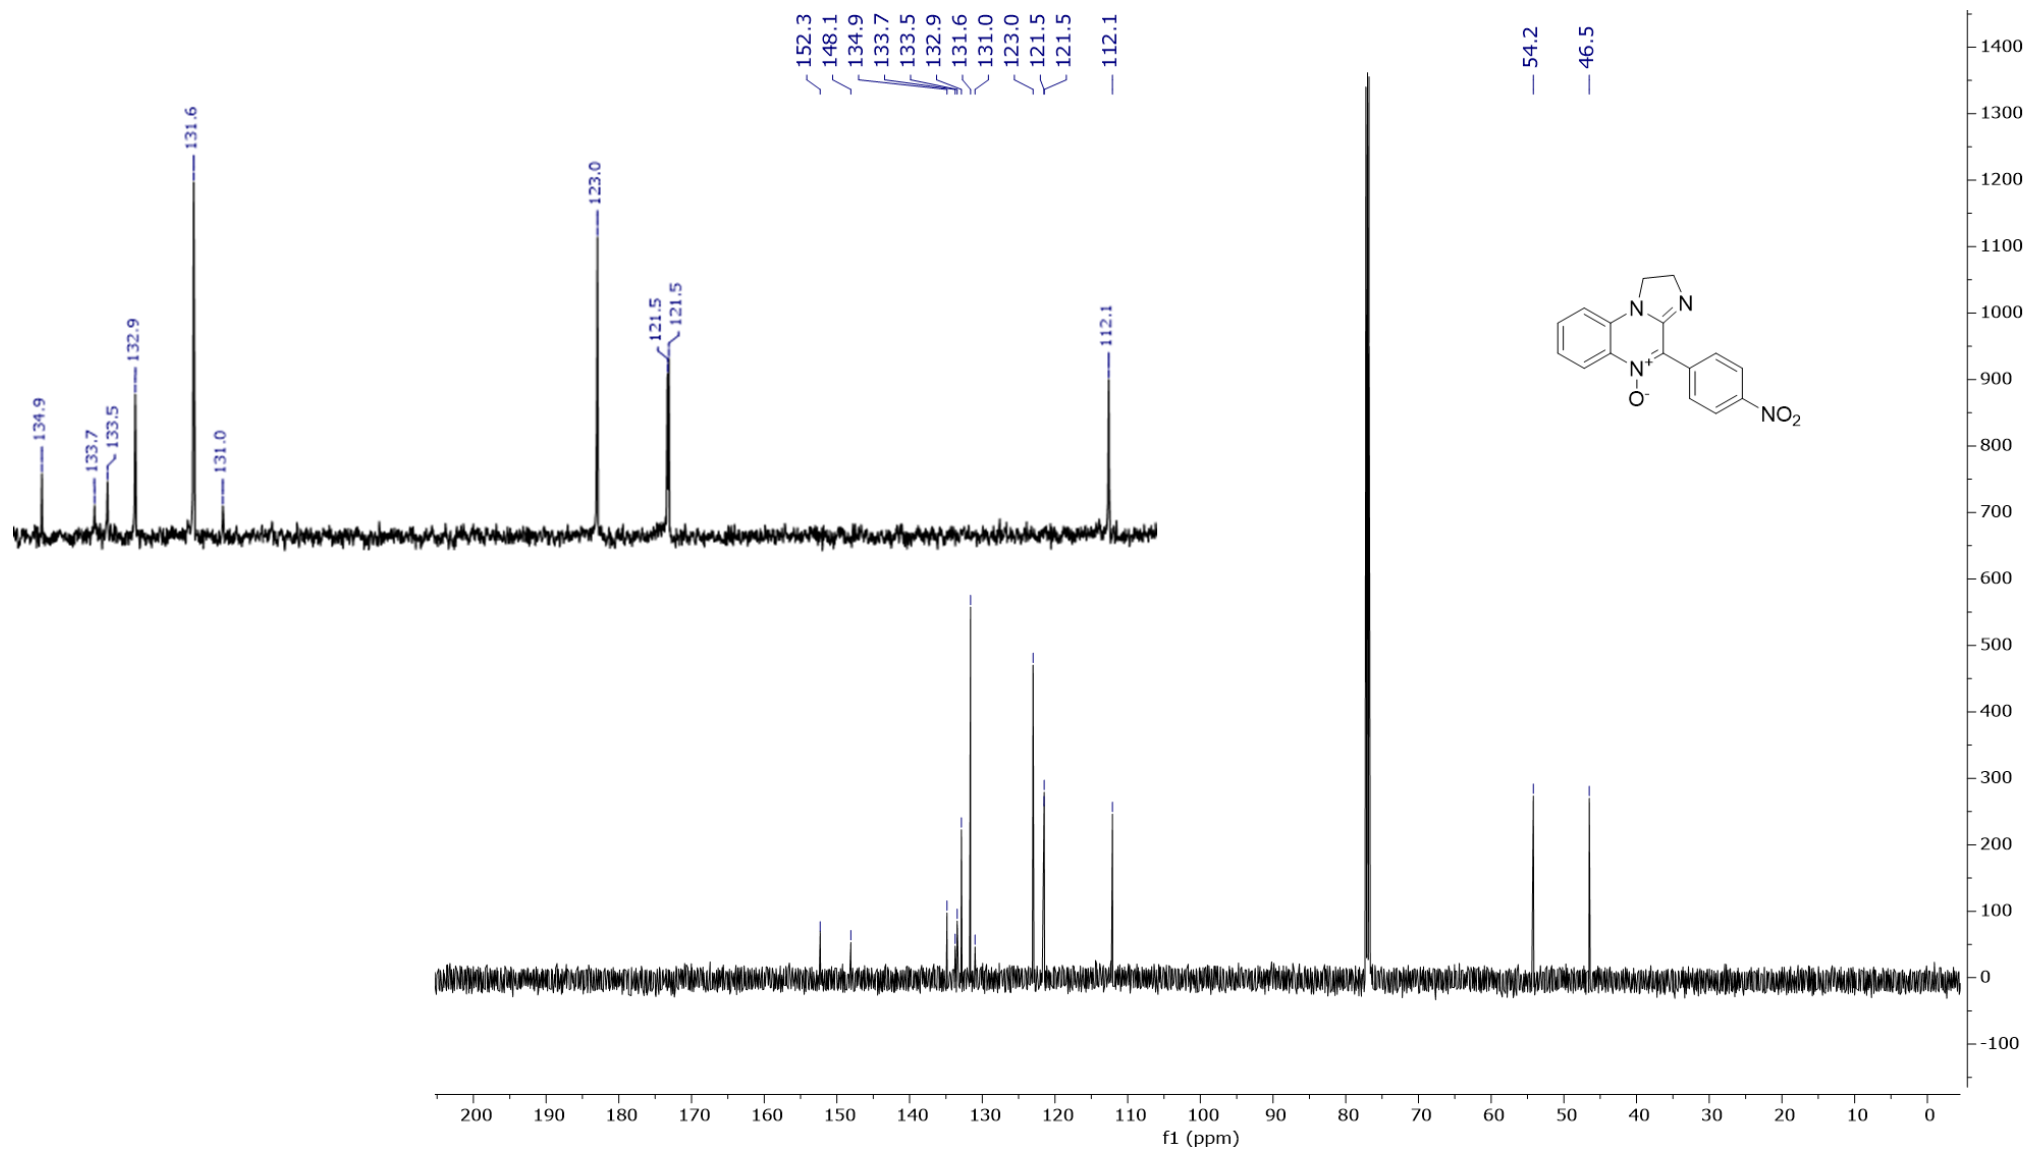

**Figure S4:**  $^{13}\text{C}$  NMR spectrum of compound **1k** (151 MHz,  $\text{CDCl}_3$ )

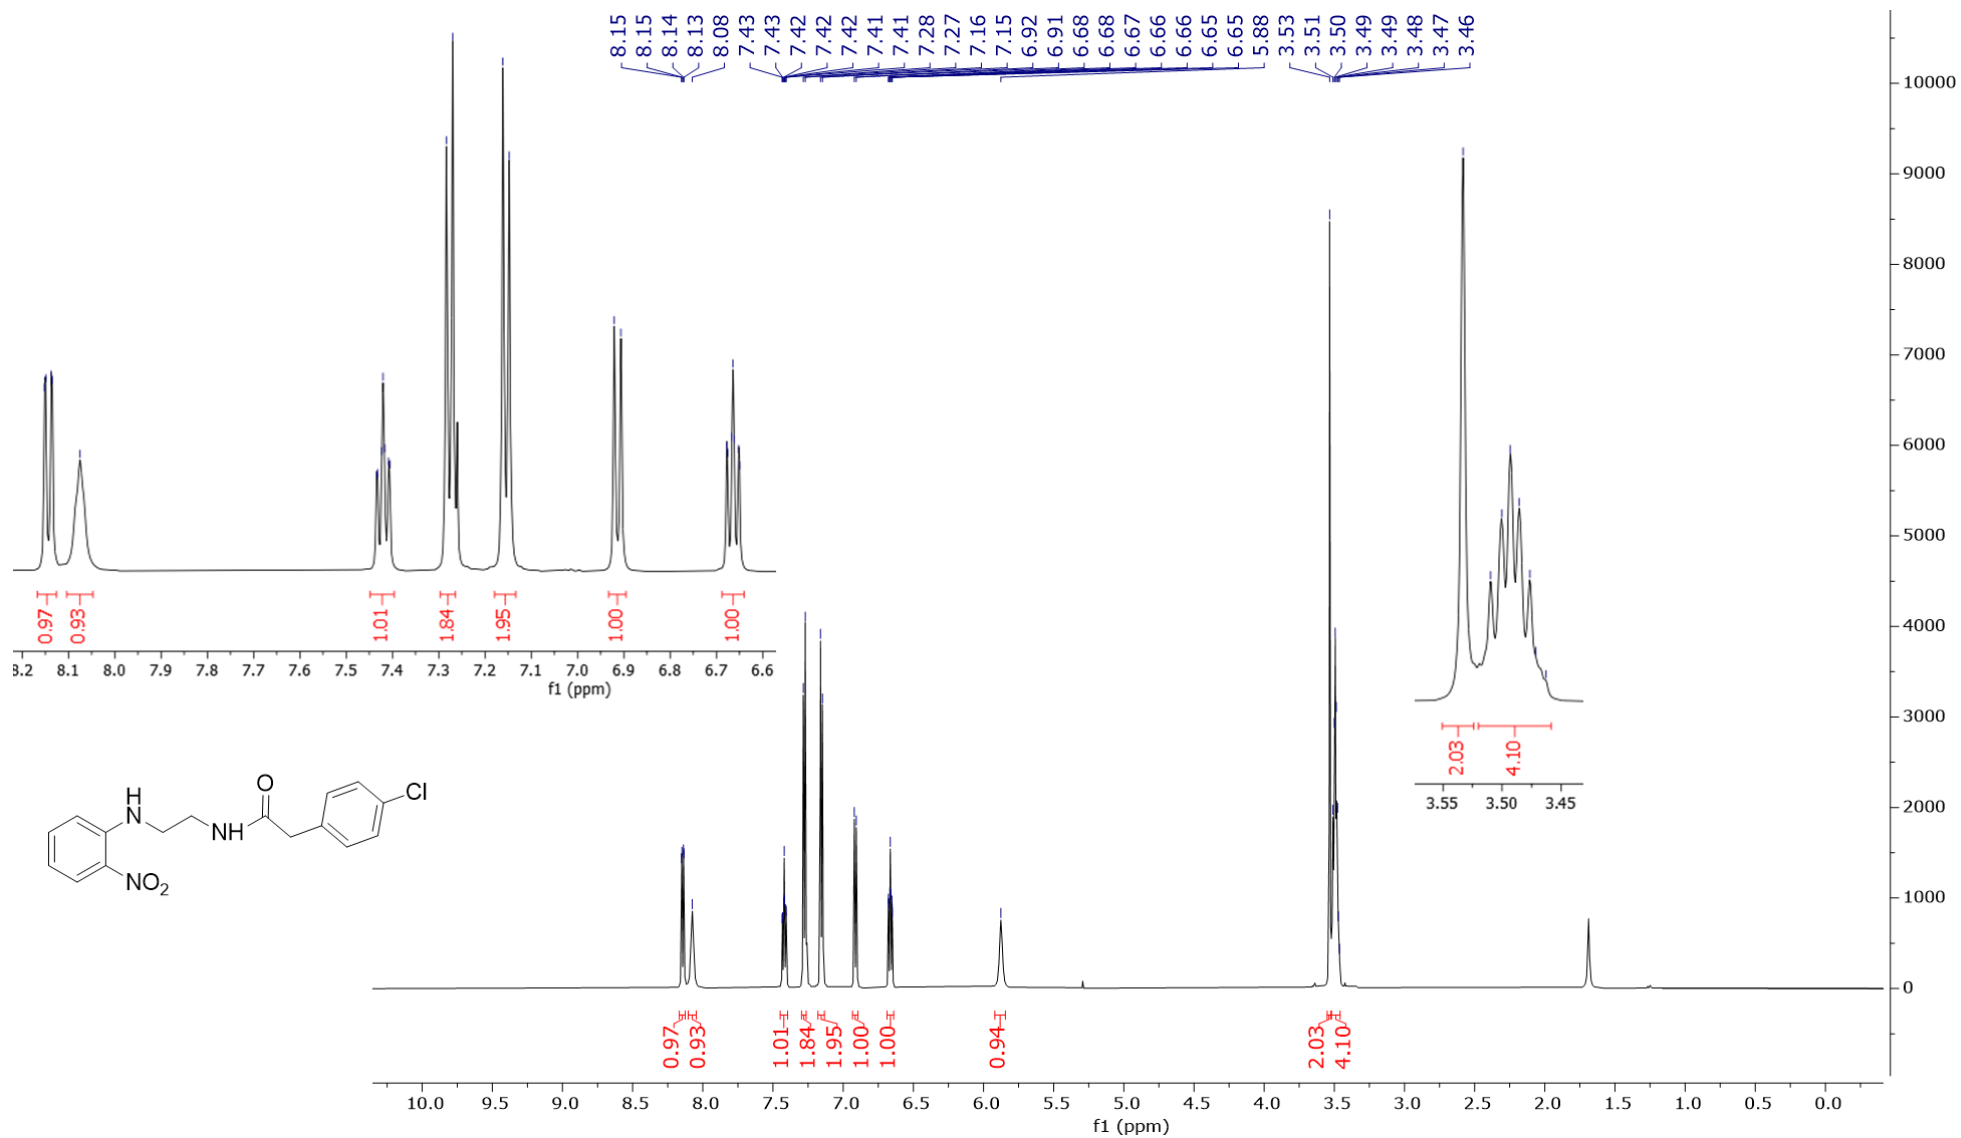

**Figure S5:** <sup>1</sup>H NMR spectrum of compound **3j** (600 MHz, CDCl<sub>3</sub>)

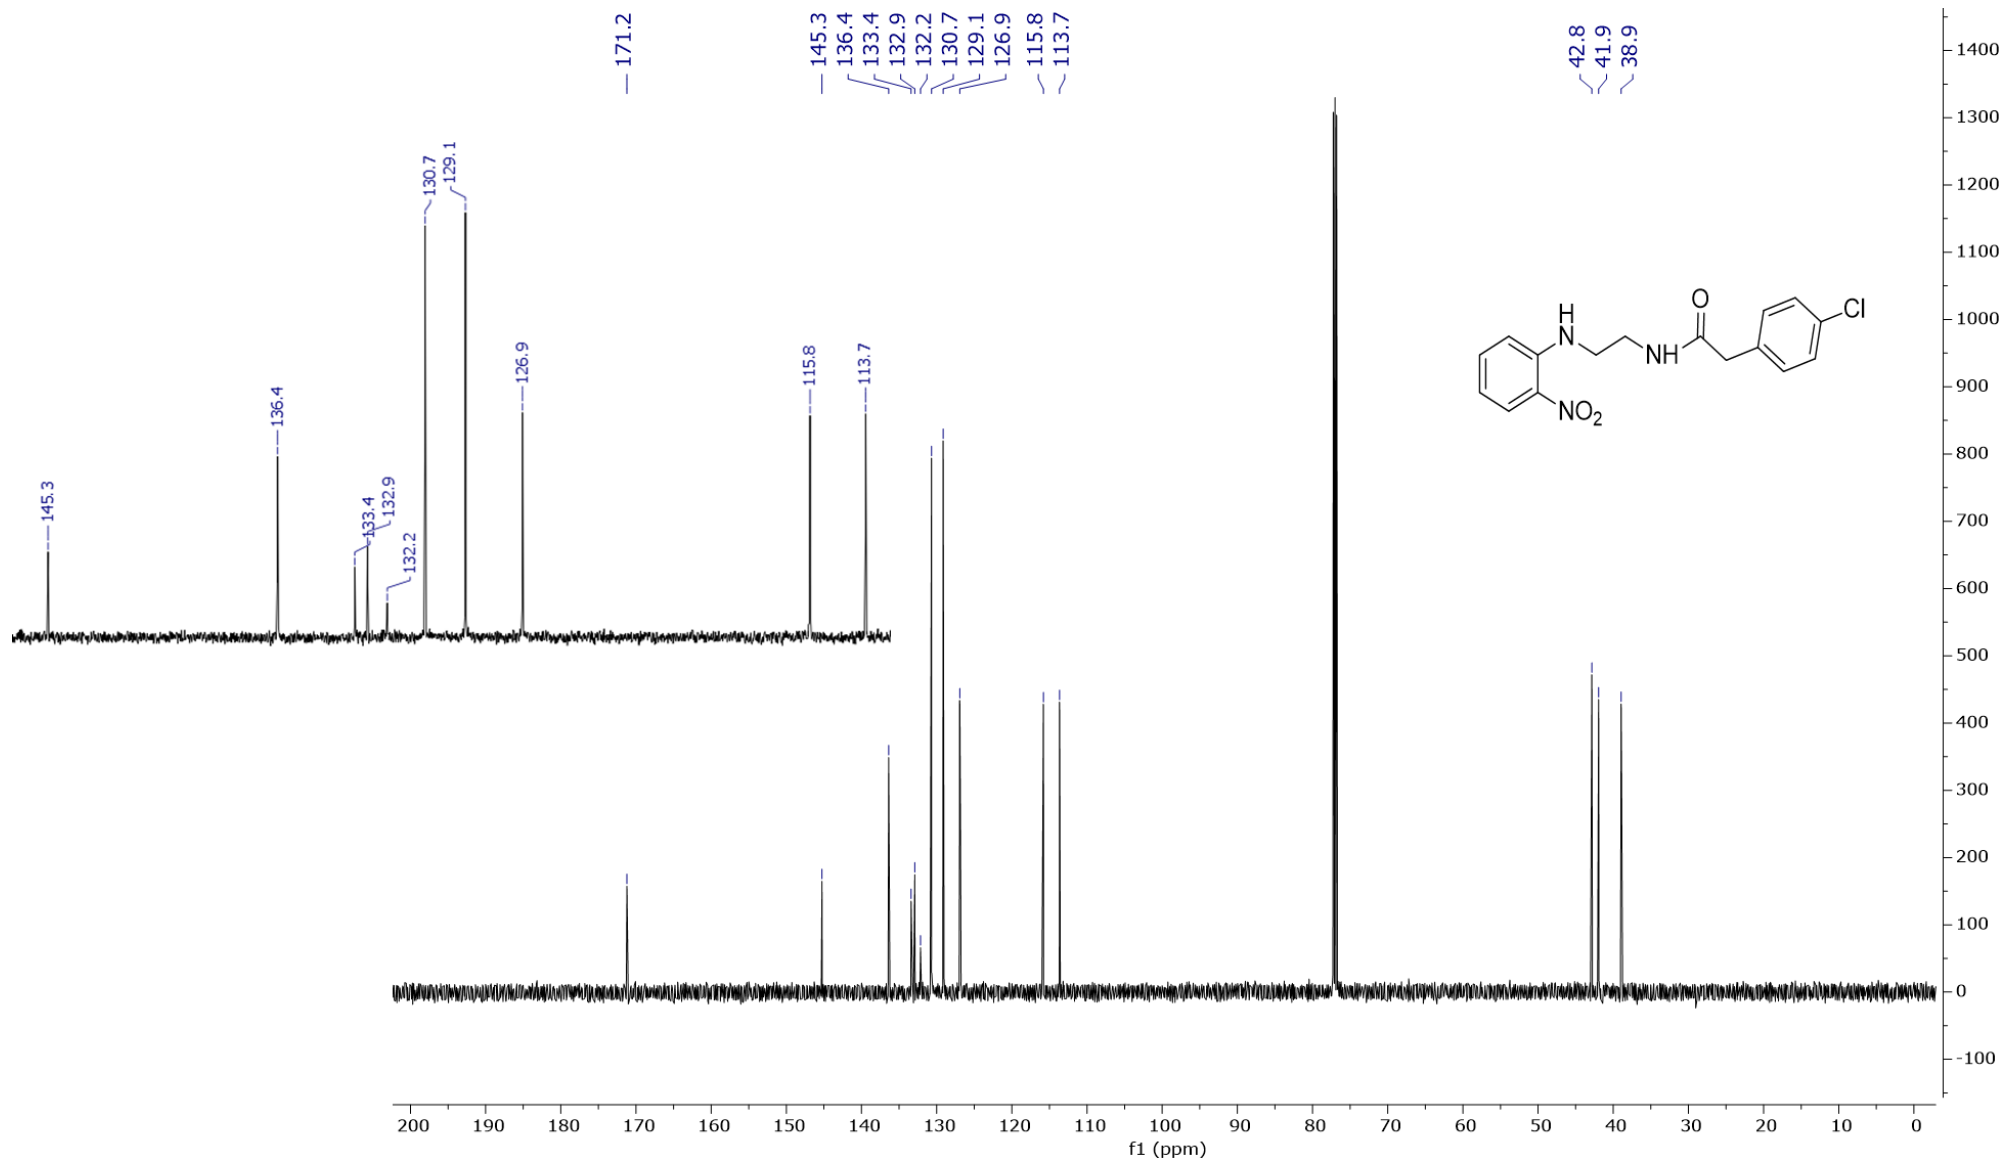

Figure S6:  $^{13}\text{C}$  NMR spectrum of compound 3j (151 MHz,  $\text{CDCl}_3$ )

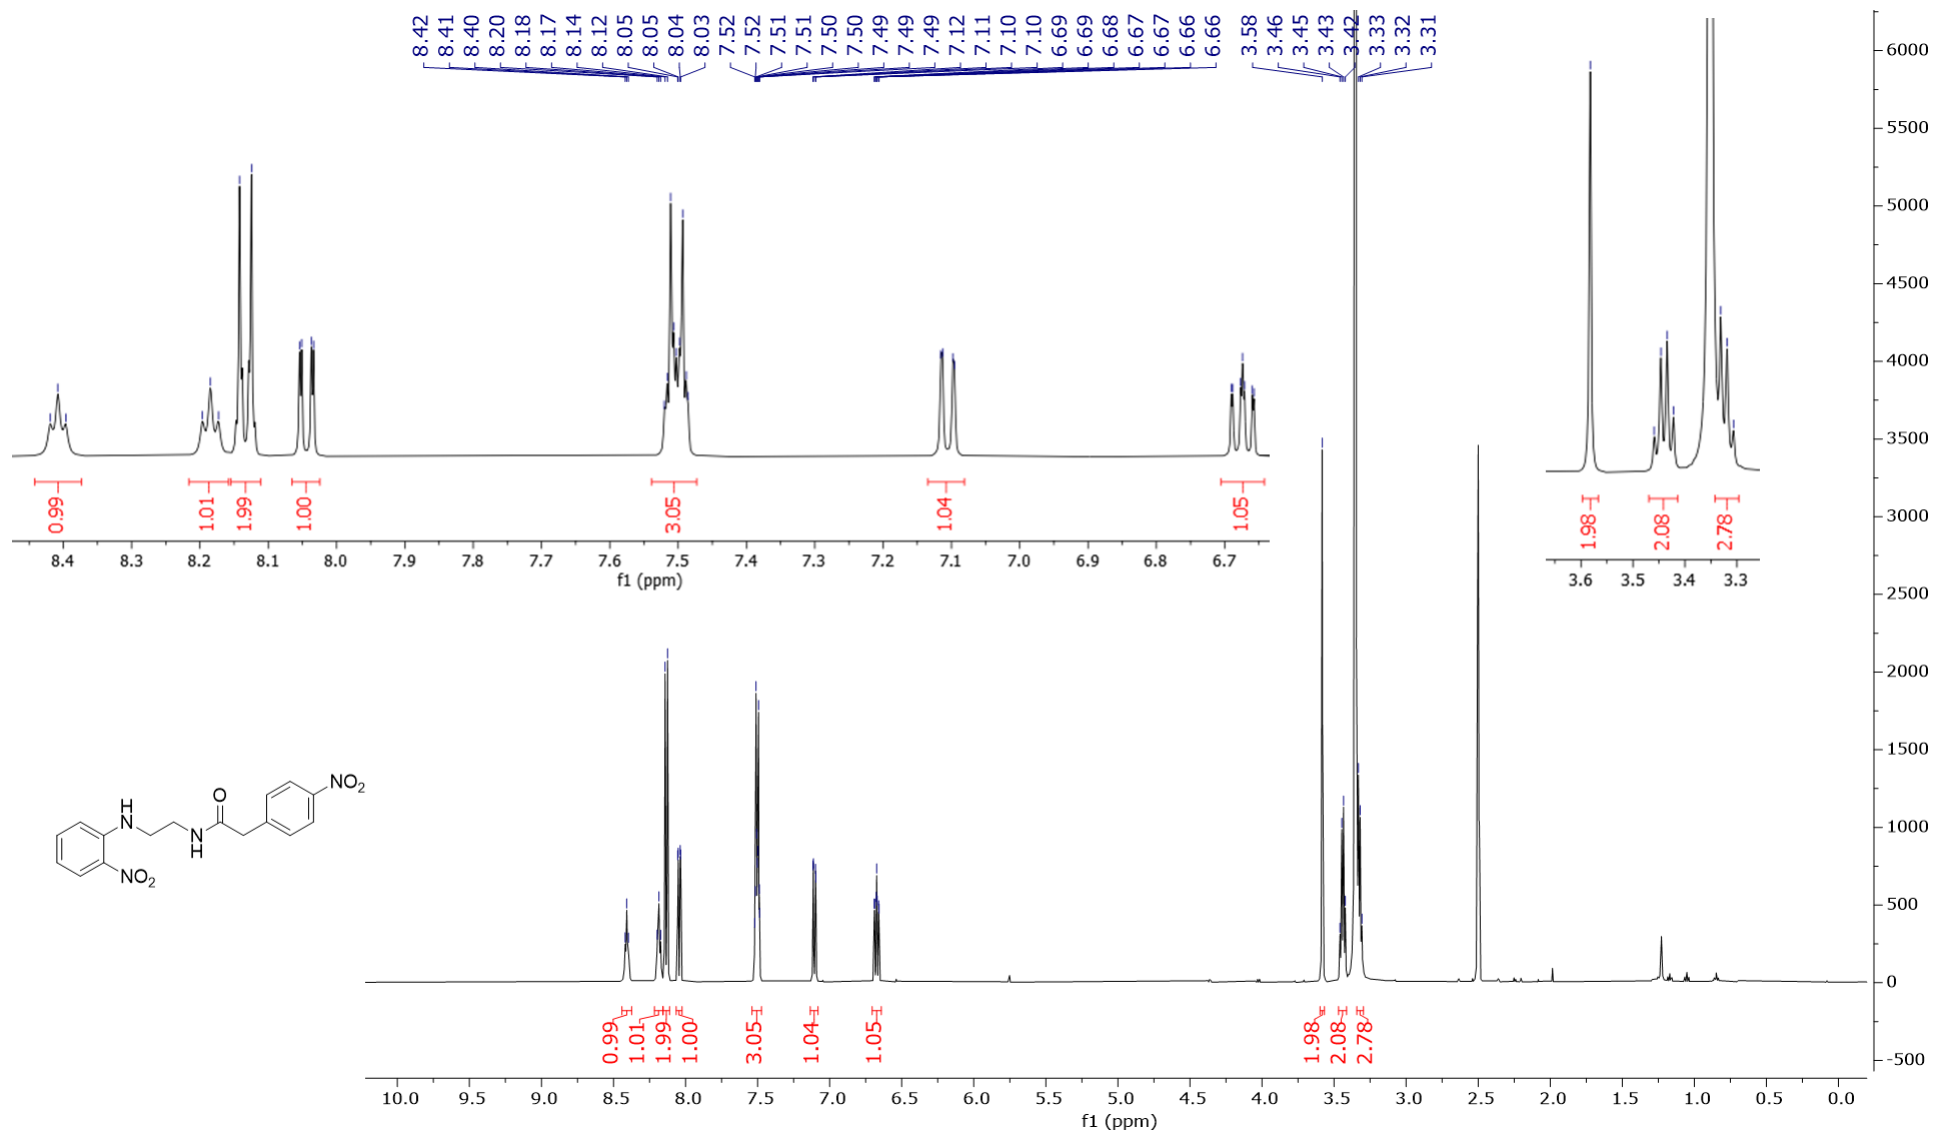

**Figure S7:** <sup>1</sup>H NMR spectrum of compound **3k** (500 MHz, DMSO-*d*<sub>6</sub>)

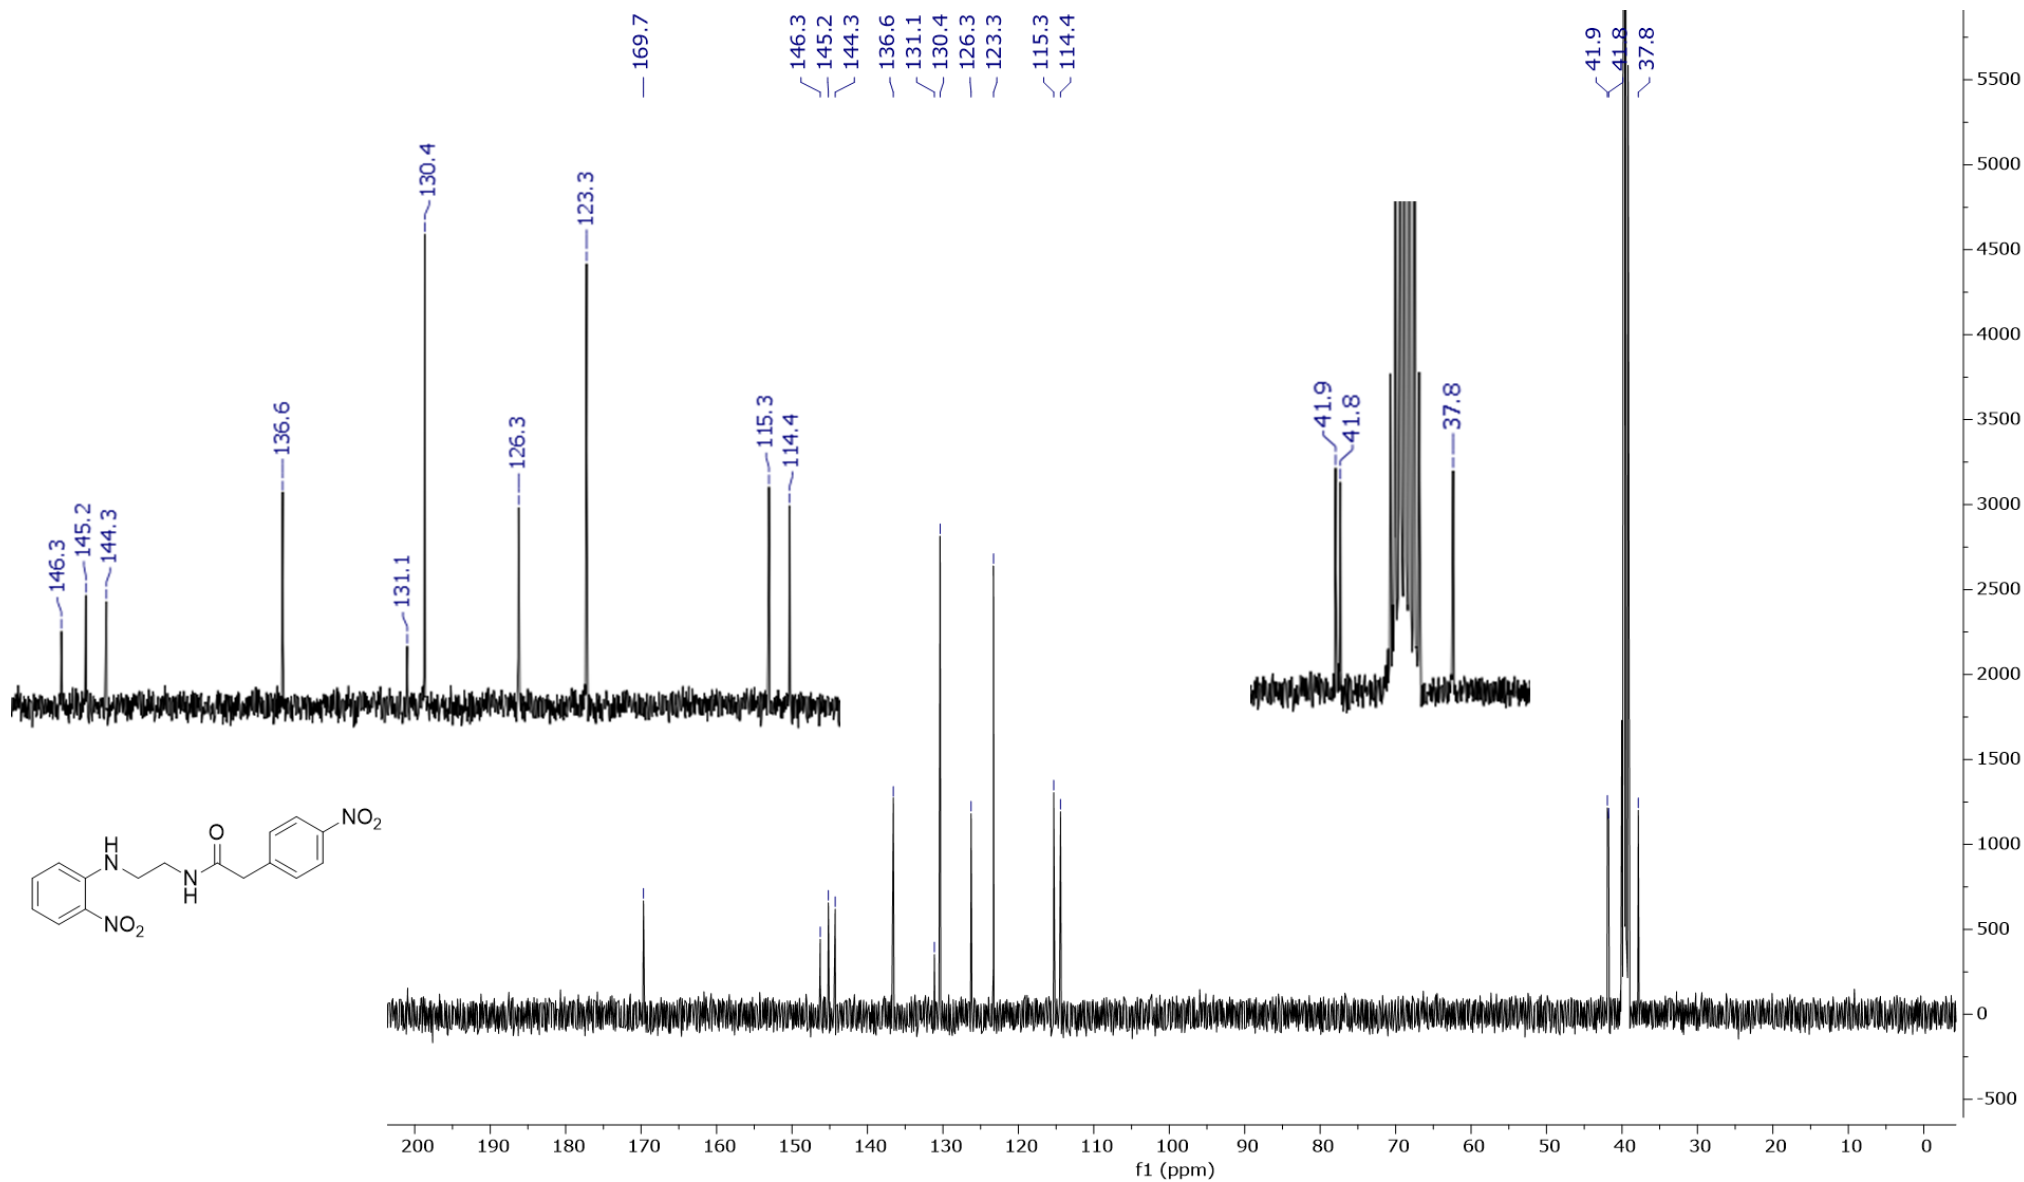

**Figure S8:**  $^{13}\text{C}$  NMR spectrum of compound **3k** (126 MHz, DMSO- $d_6$ )

Spectra of compounds **4j-1** contain signals due to spontaneous rearrangement to the corresponding *N*-oxides **1**.

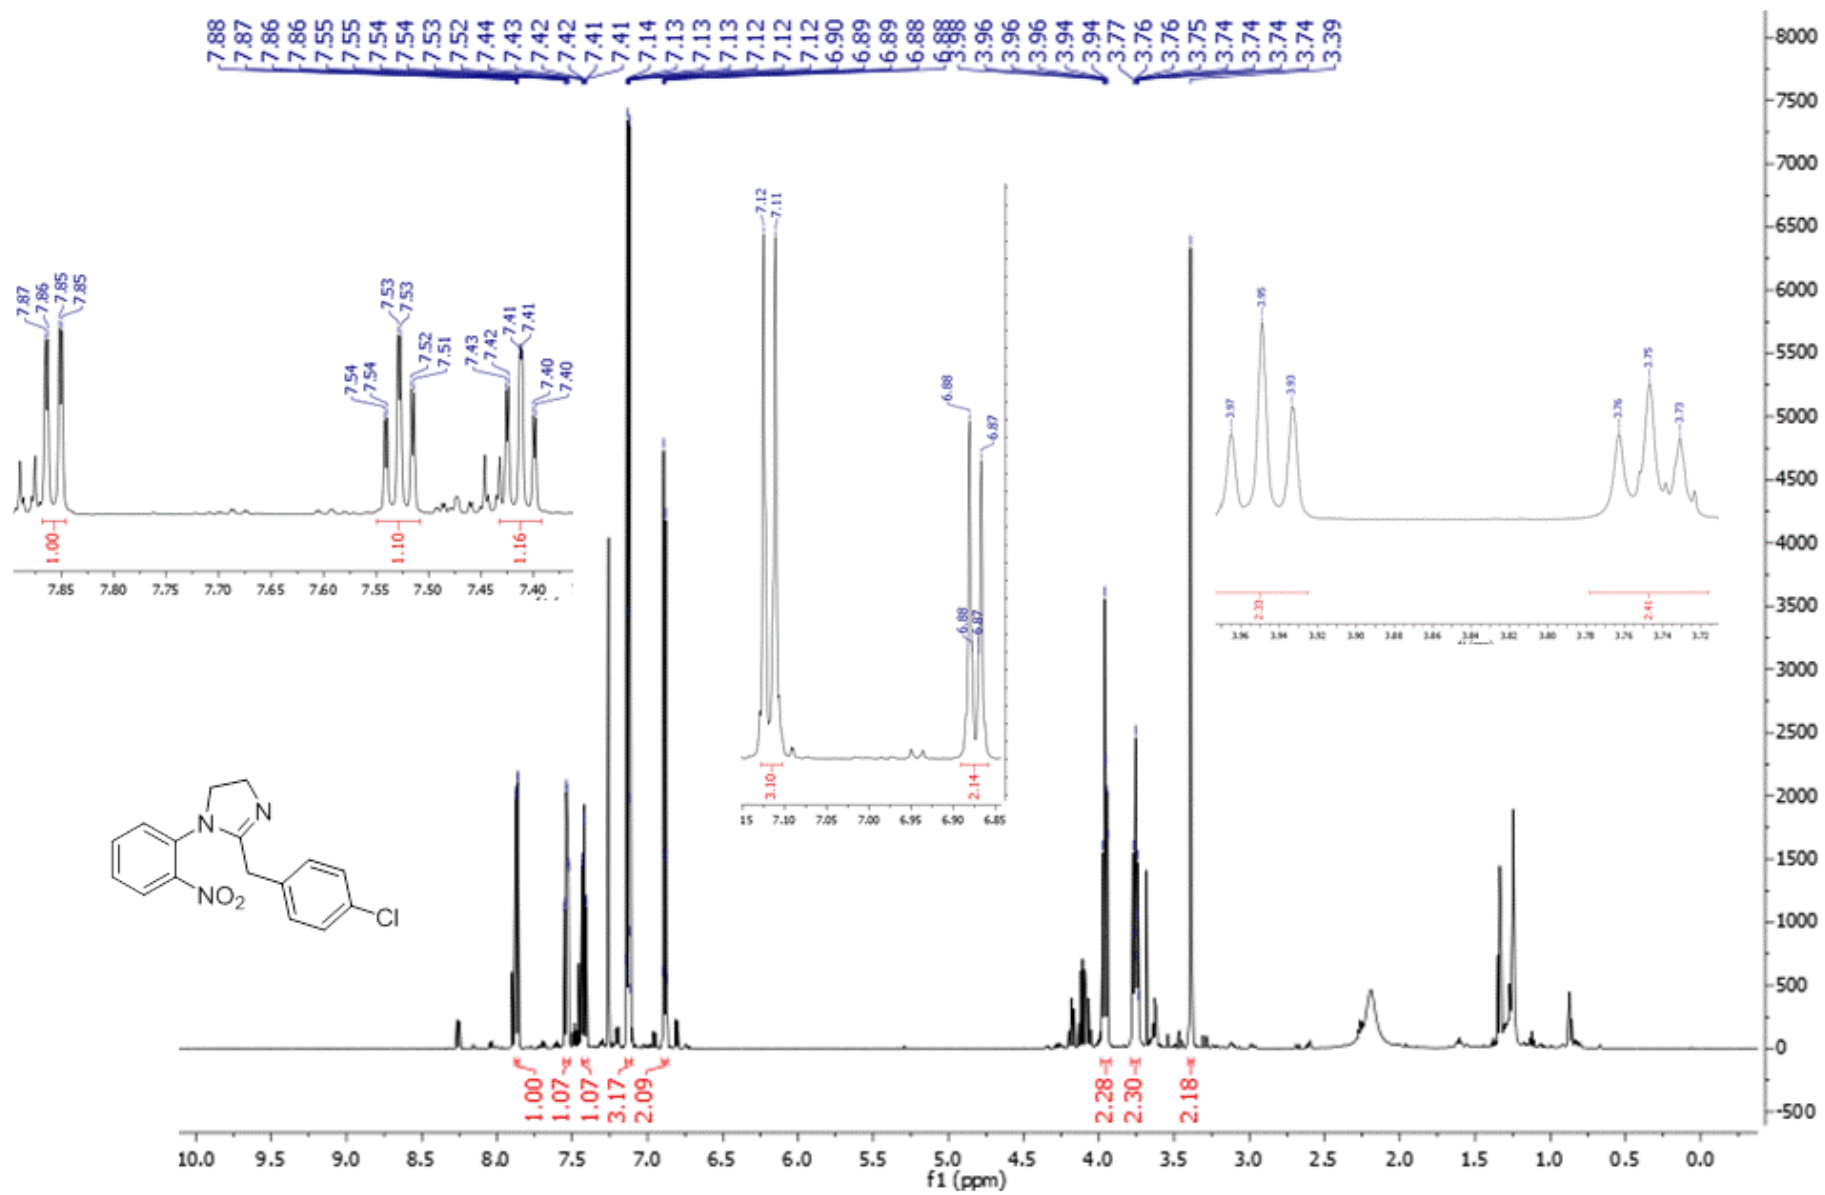

Figure S9: <sup>1</sup>H NMR spectrum of compound **4j** (600 MHz, CDCl<sub>3</sub>)

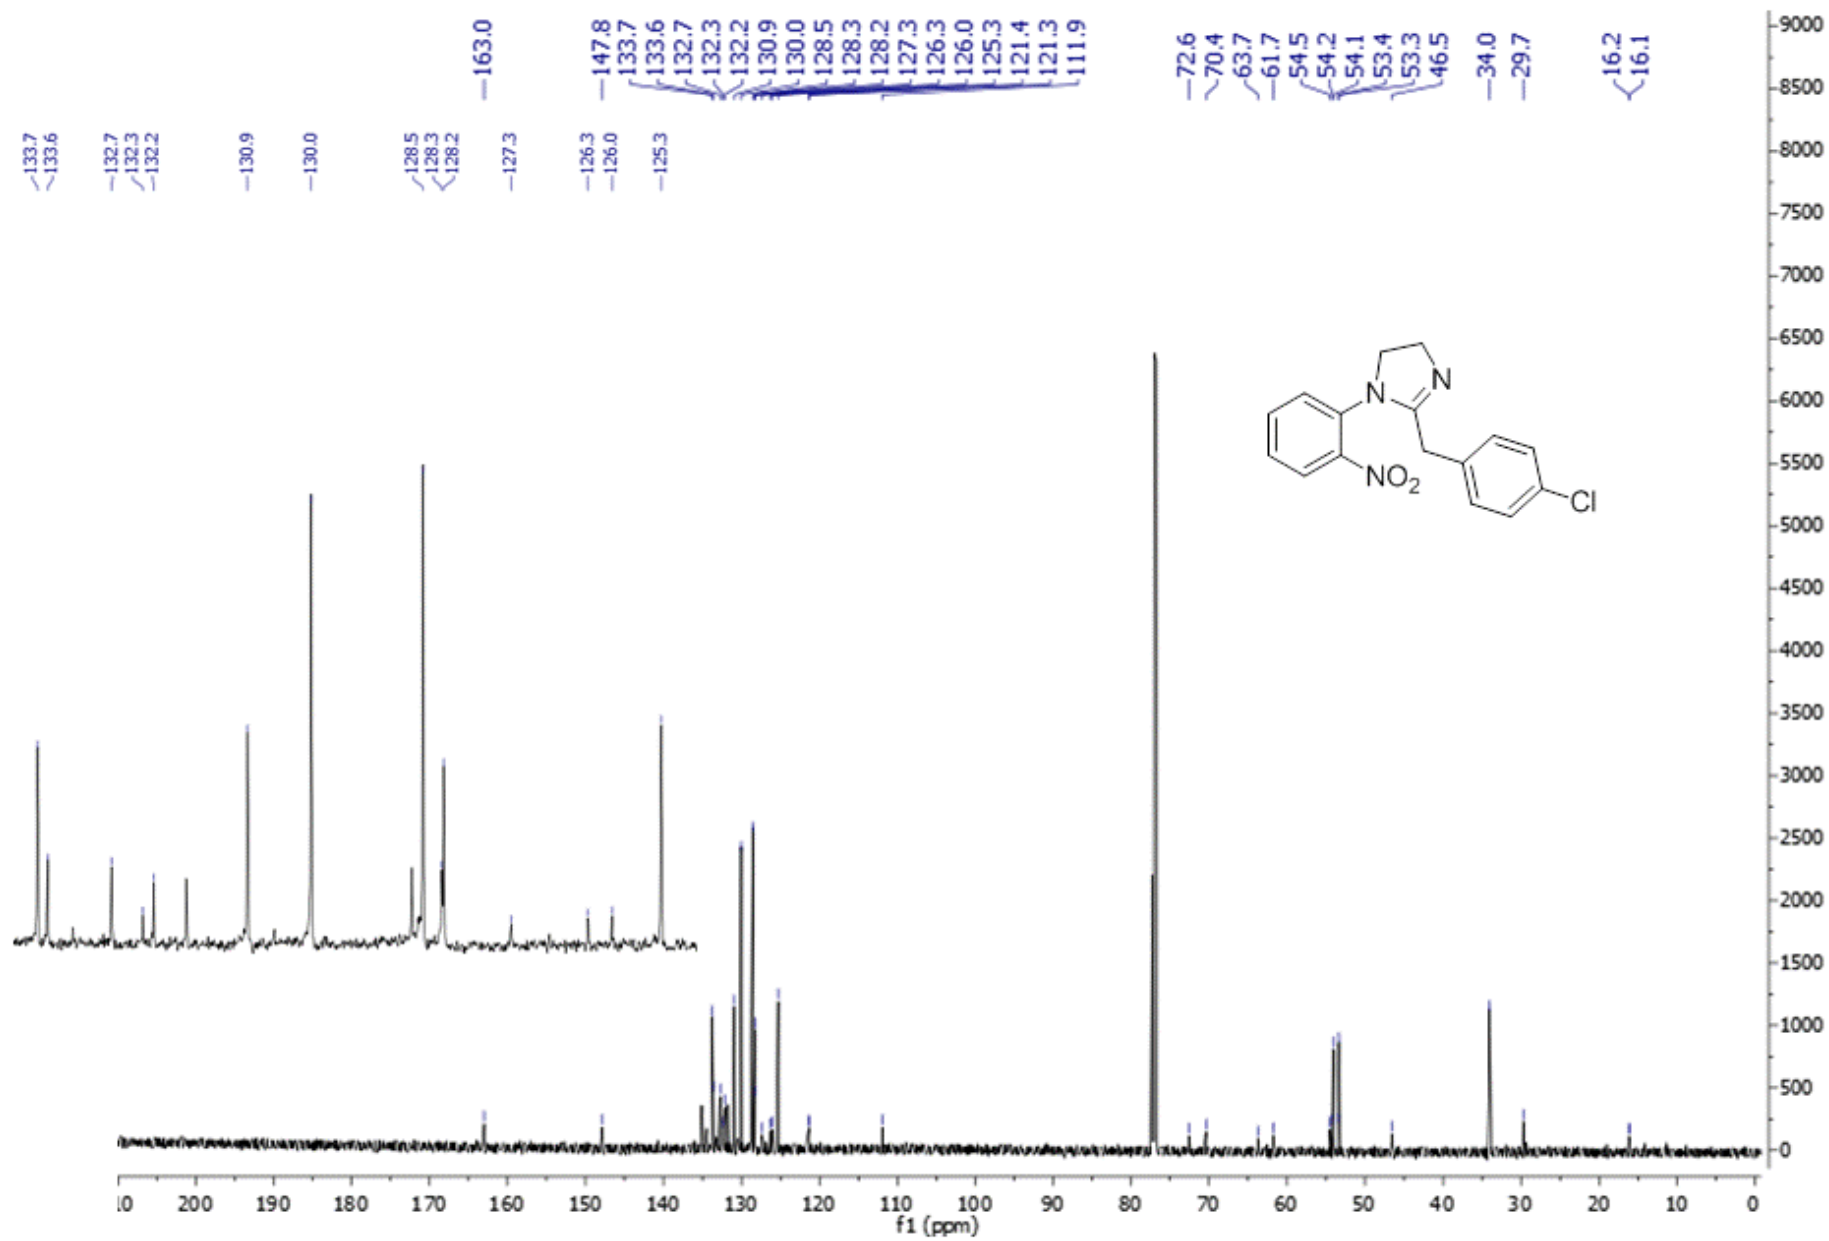

Figure S10:  $^{13}\text{C}$  NMR spectrum of compound **4j** (151 MHz,  $\text{CDCl}_3$ )

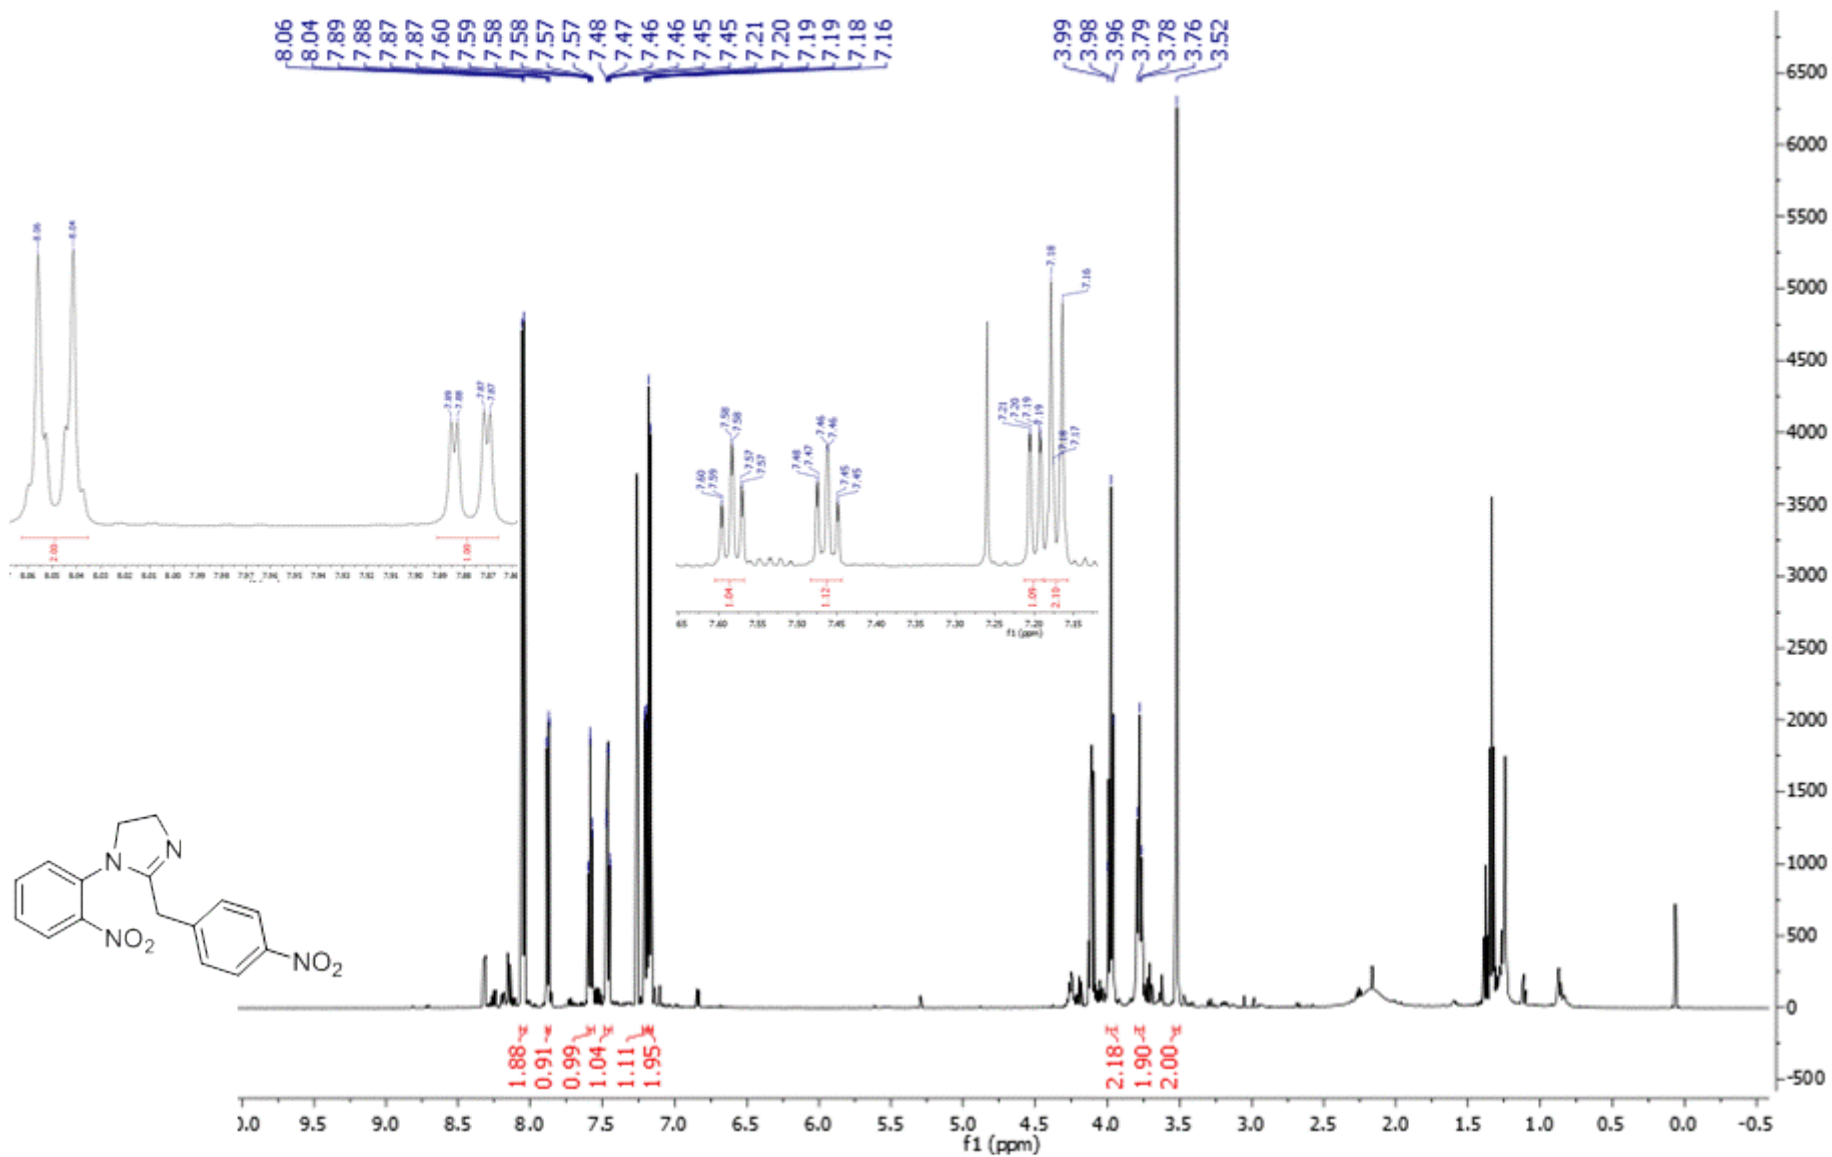

Figure S11: <sup>1</sup>H NMR spectrum of compound 4k (600 MHz, CDCl<sub>3</sub>)



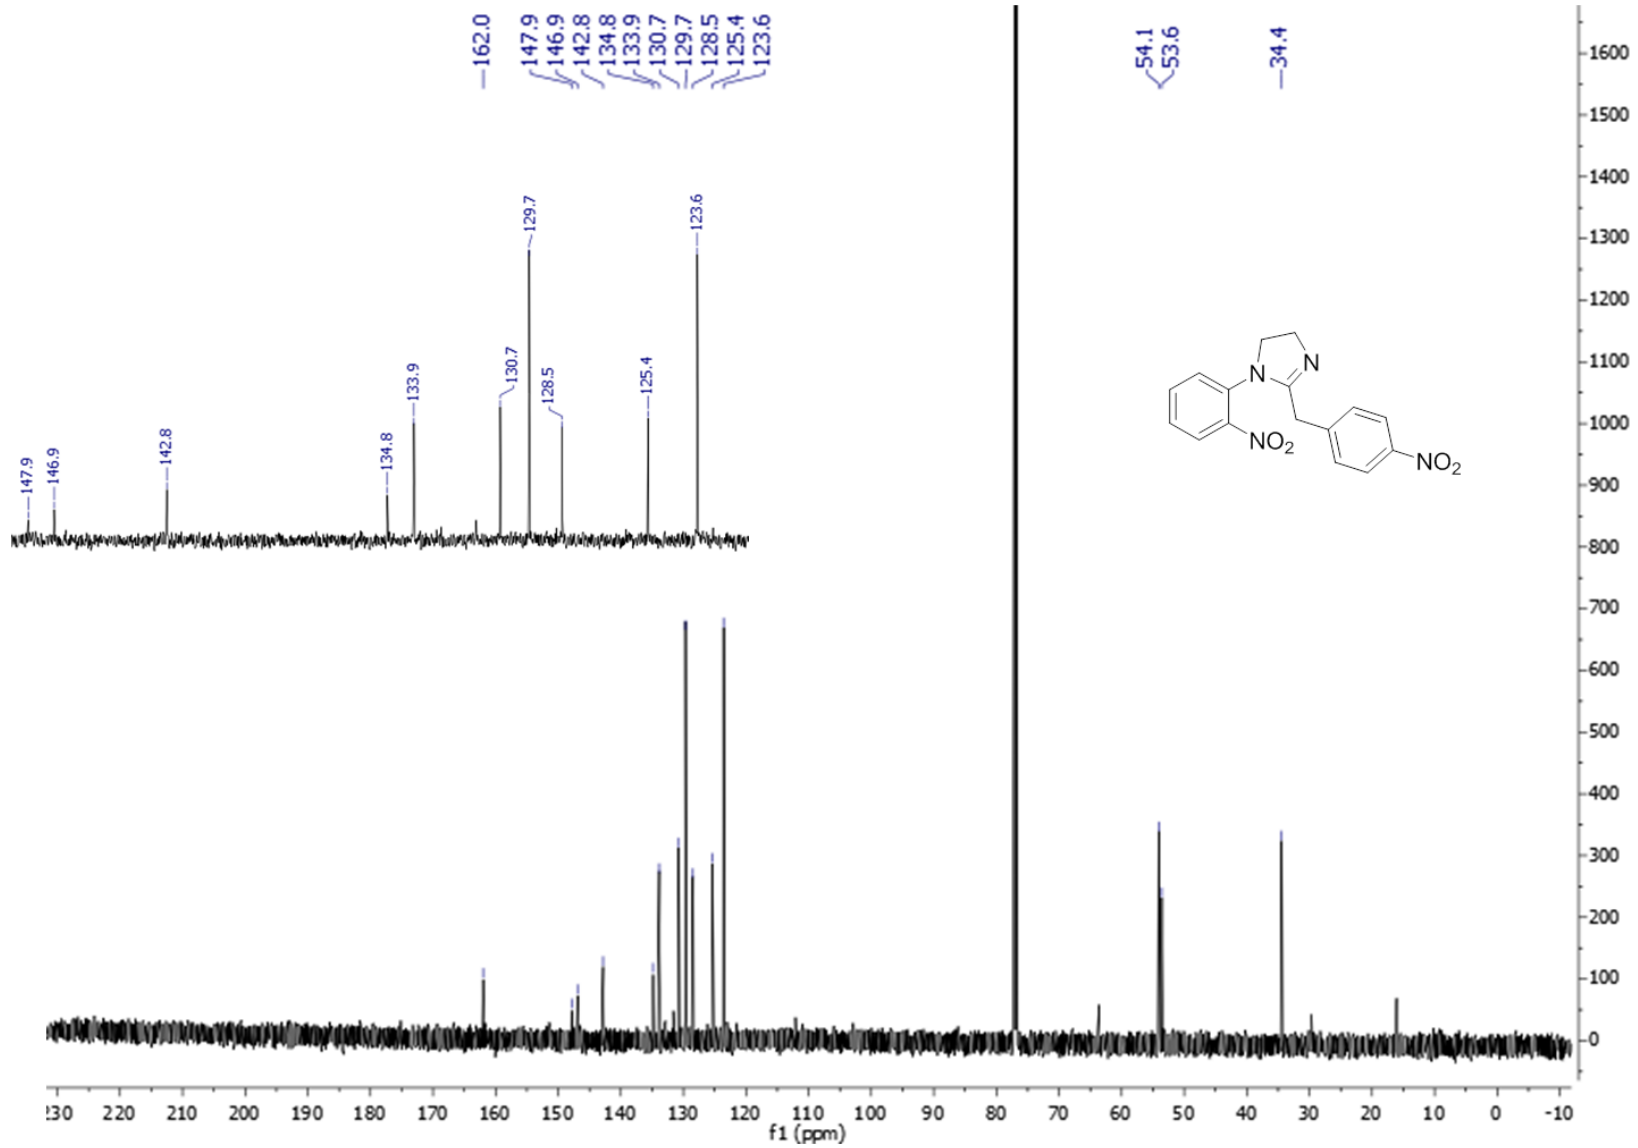

Figure S12:  $^{13}\text{C}$  NMR spectrum of compound **4k** (151 MHz,  $\text{CDCl}_3$ )

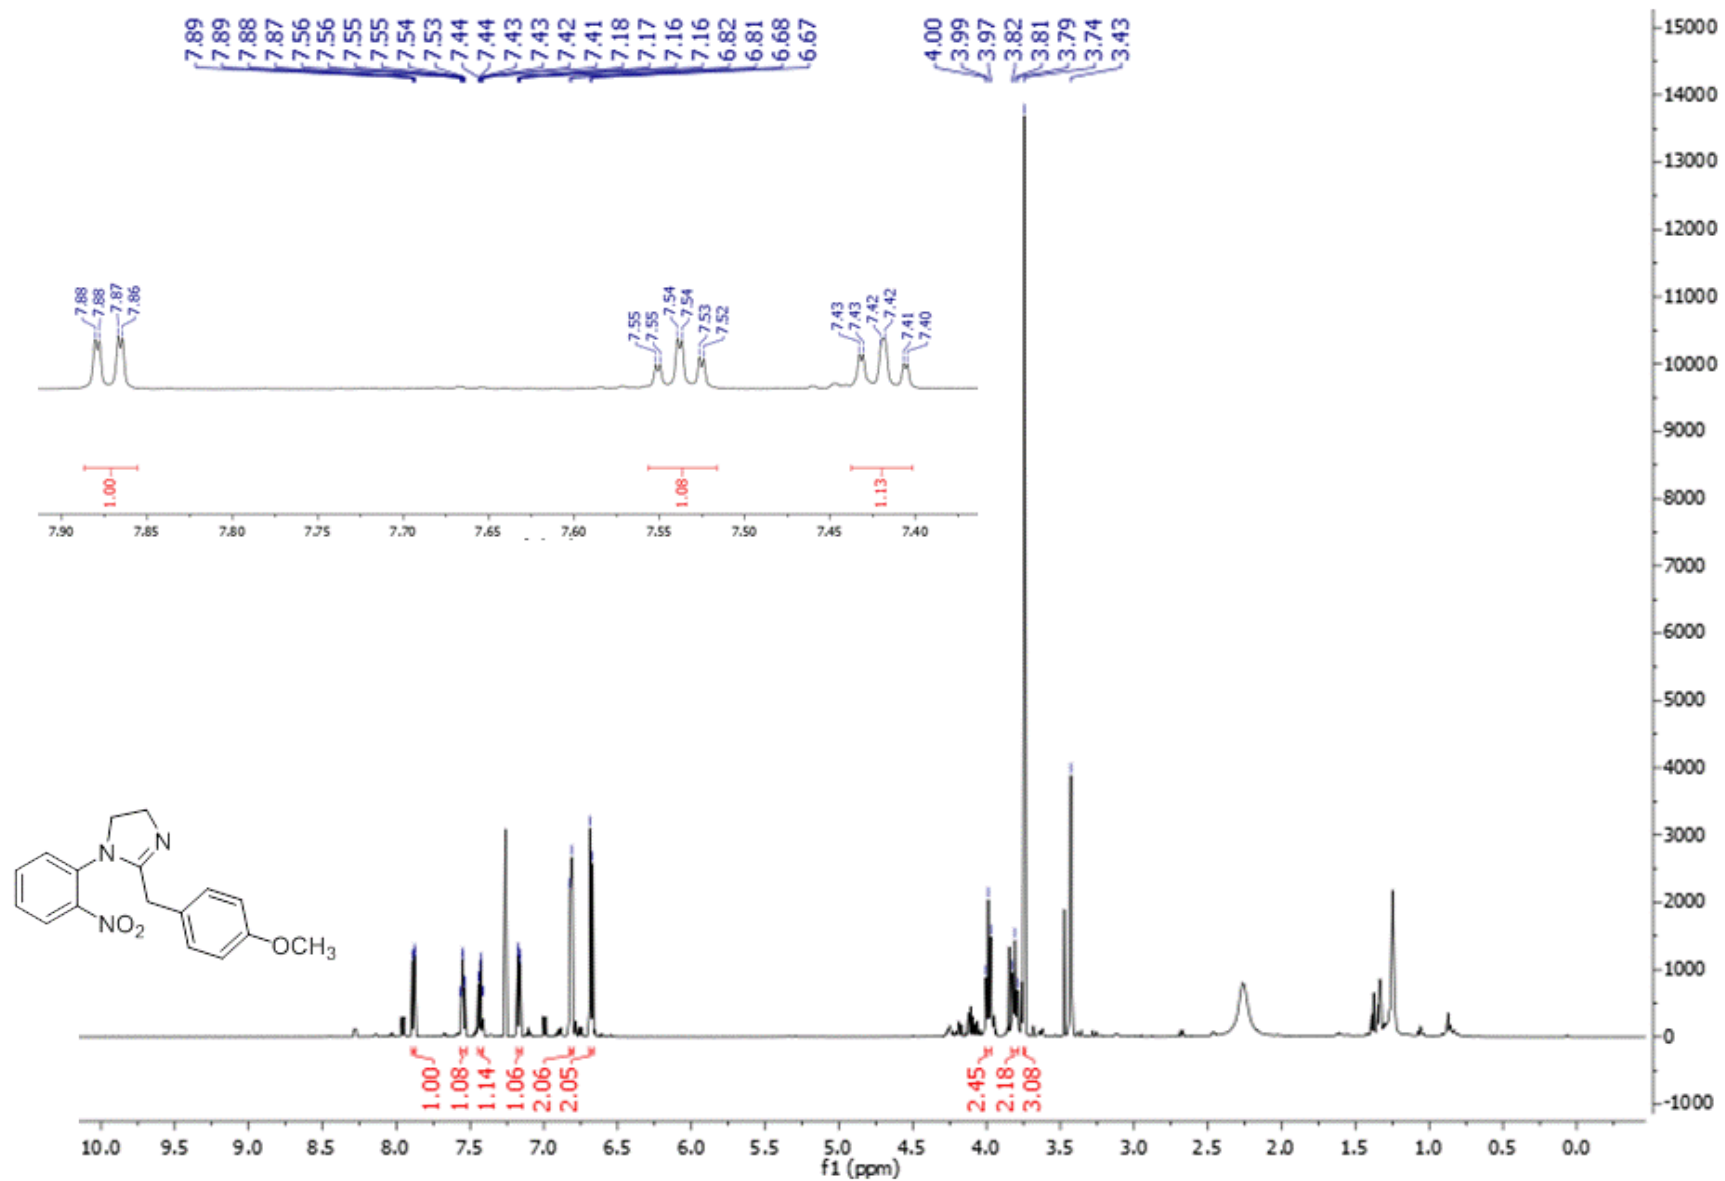

**Figure S13:** <sup>1</sup>H NMR spectrum of compound **4l** (600 MHz, CDCl<sub>3</sub>)

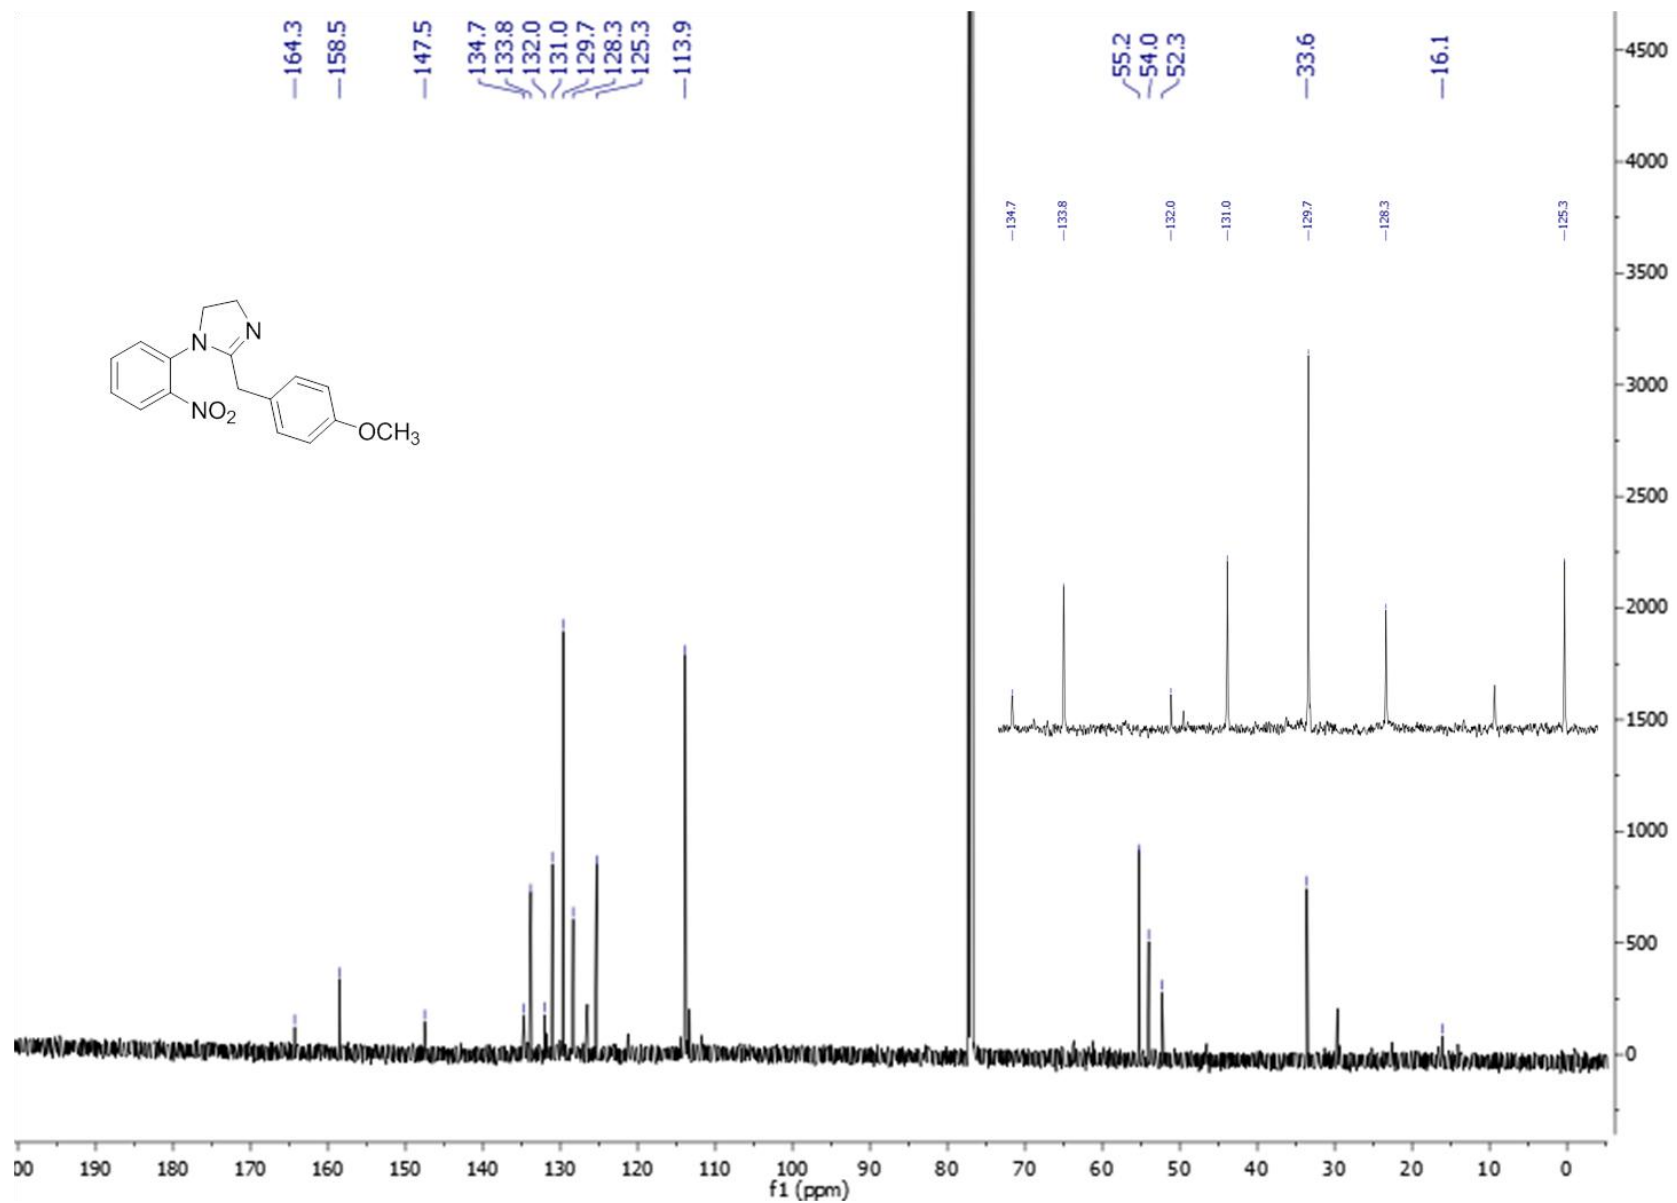

Figure S14: <sup>13</sup>C NMR spectrum of compound **4I** (151 MHz, CDCl<sub>3</sub>)

Copies of IR Spectra

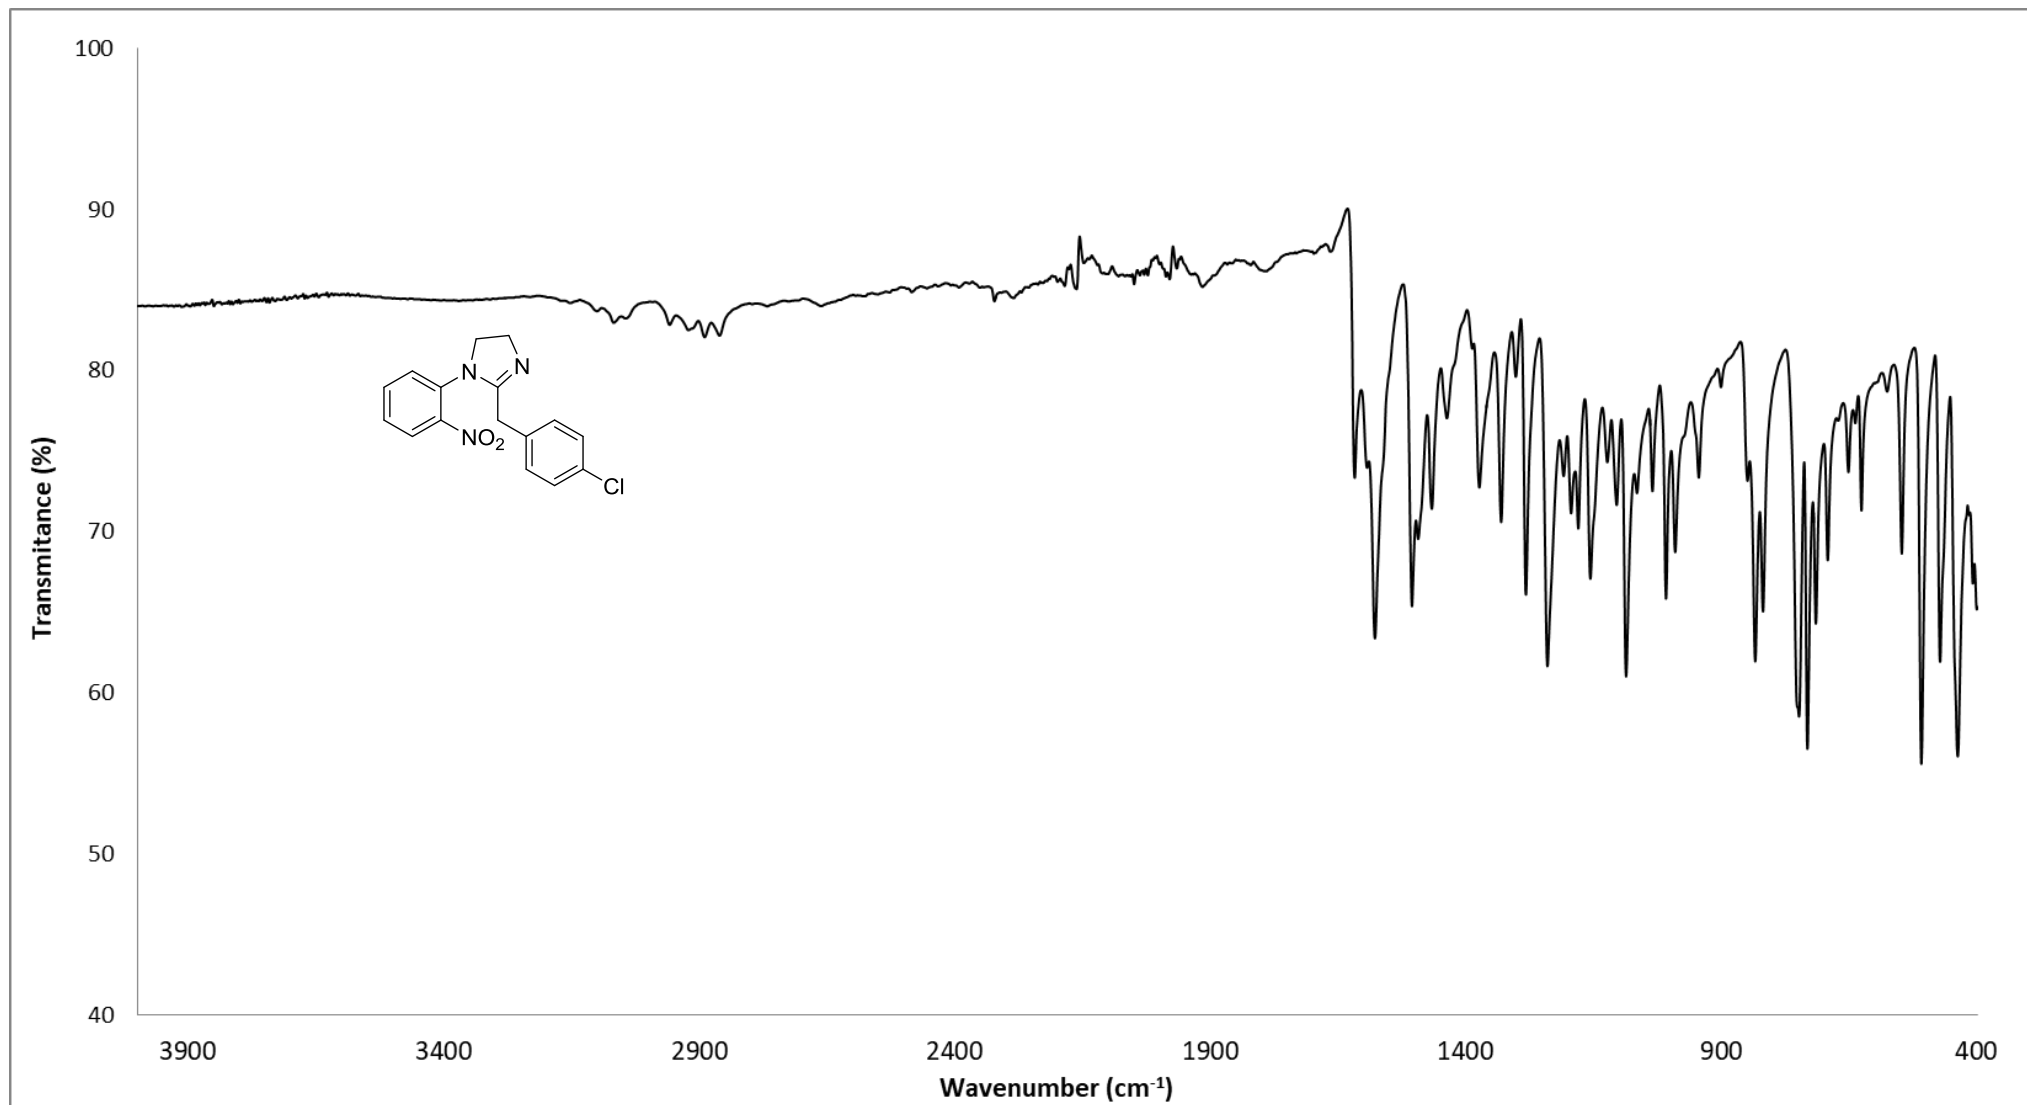

**Figure S15:** Diamond ATR-FTIR spectrum of **1j**

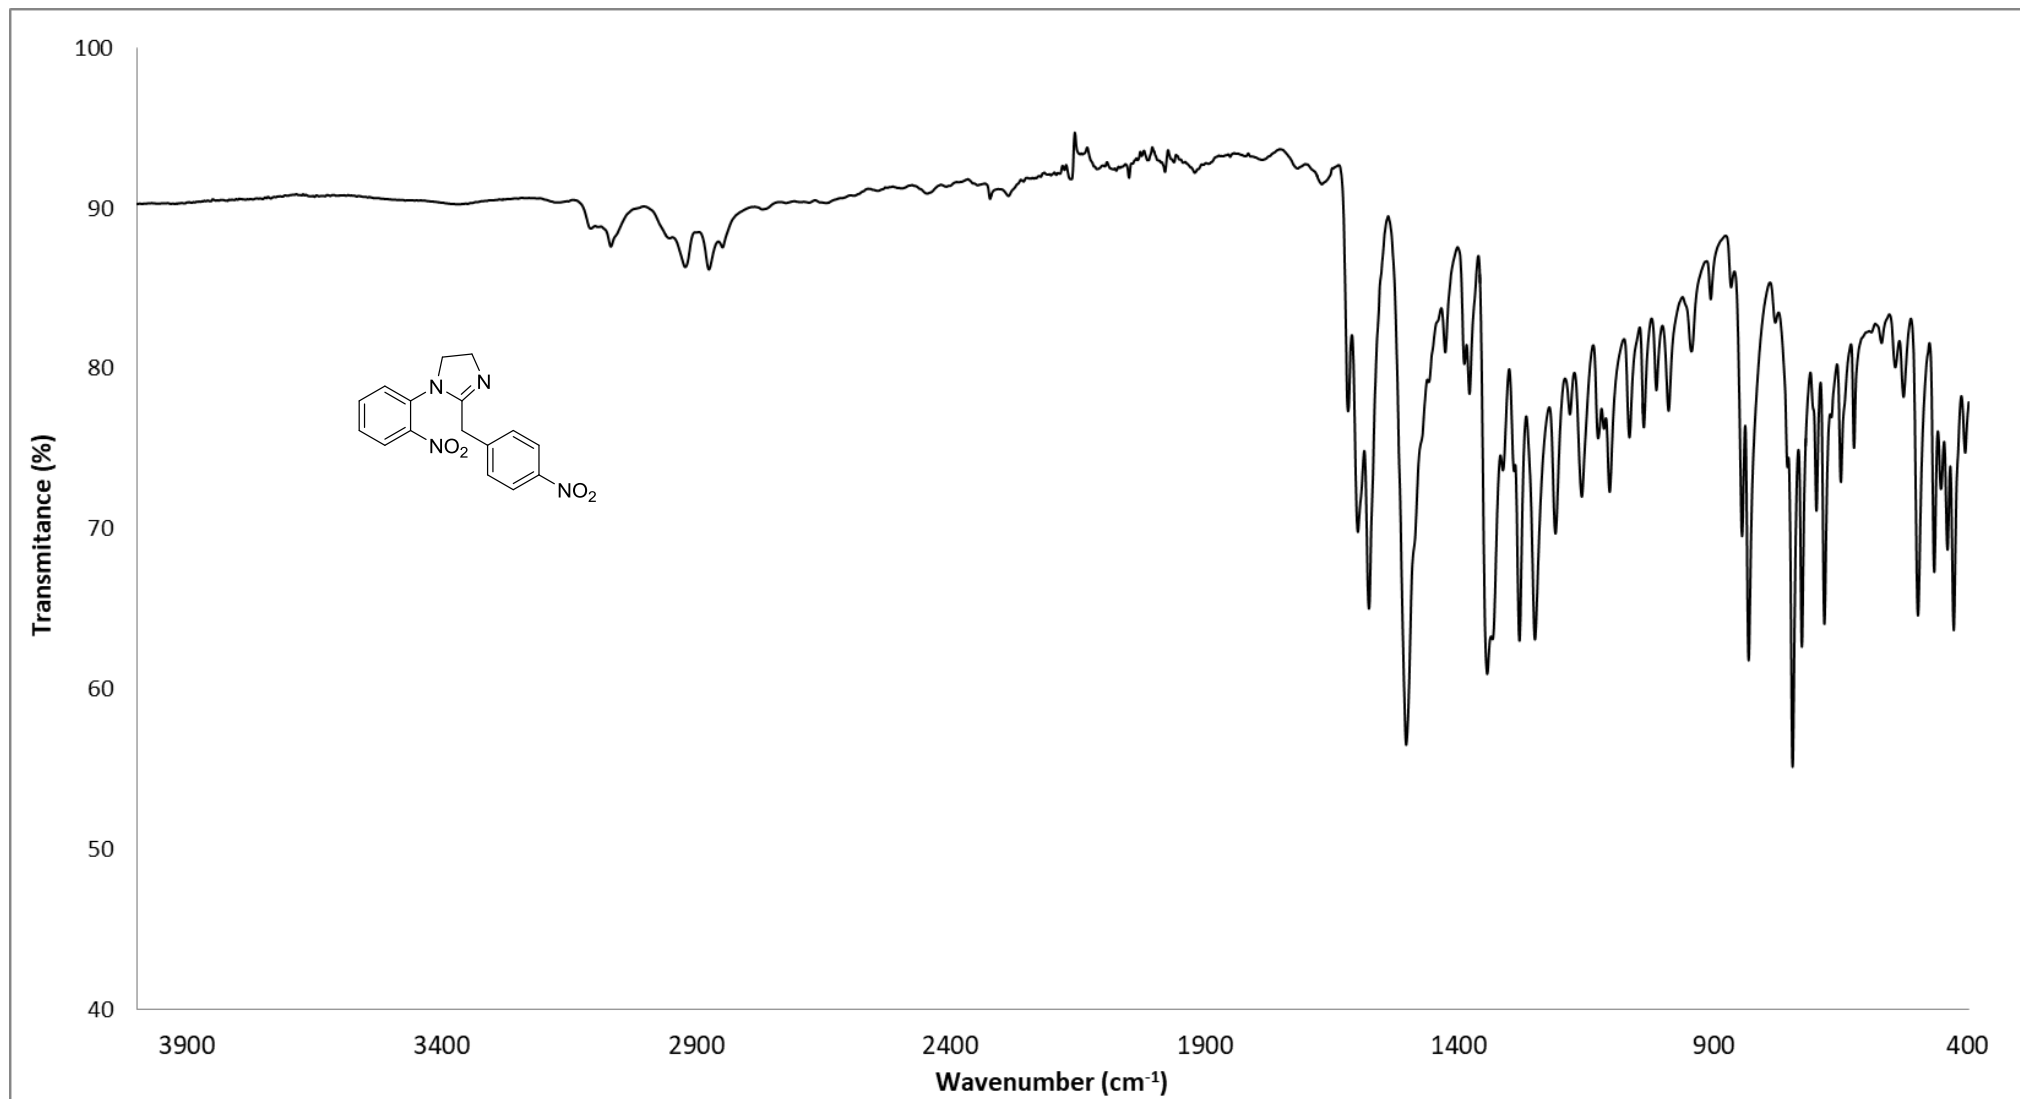

**Figure S16:** Diamond ATR-FTIR spectrum of **1k**

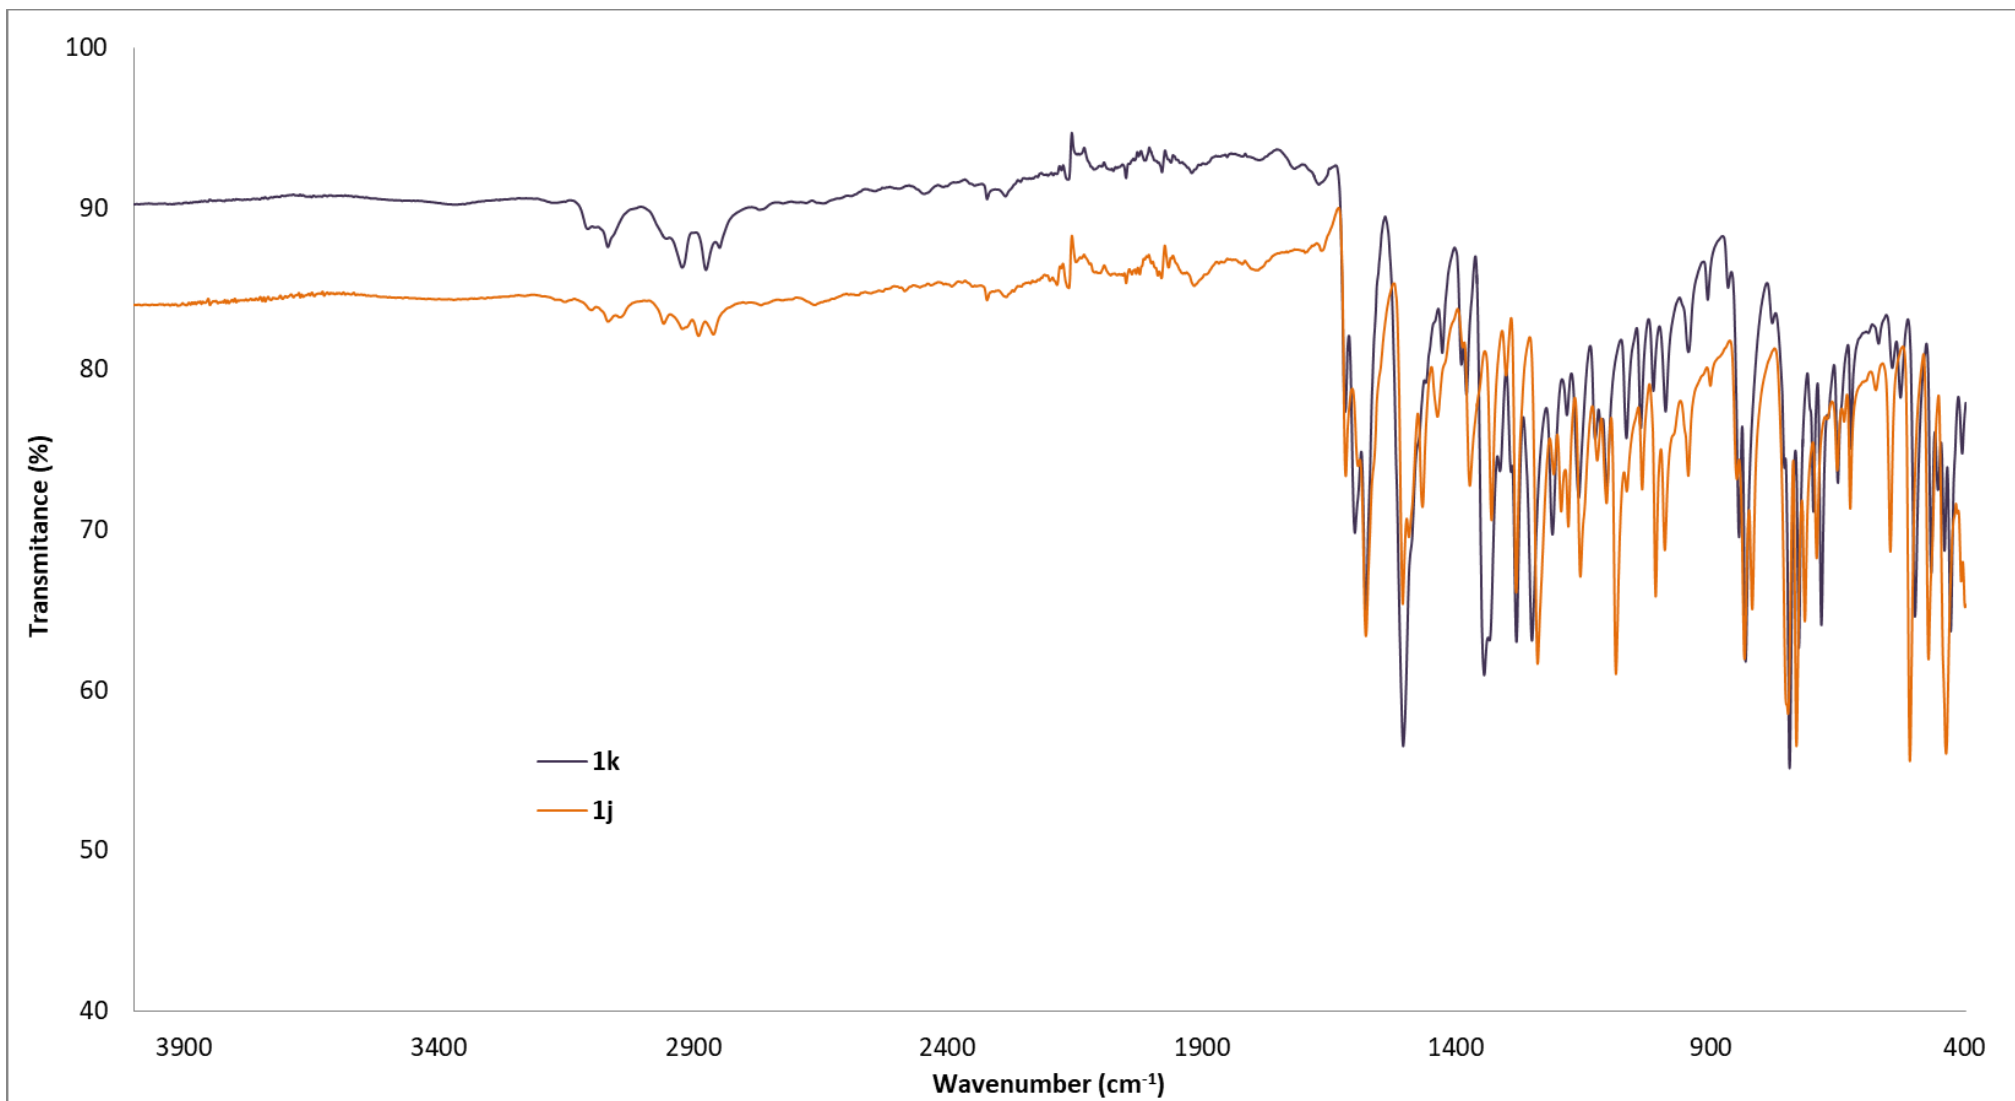

**Figure S17:** Overlapping Diamond ATR-FTIR spectrum of **1j** and **1k**

## Copies of HRMS spectra

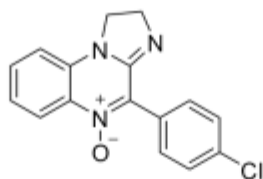

| <i>m/z</i><br>experimental | Especie iónica detectada | Fórmula molecular<br>de M                          | <i>m/z</i> | Error (mDa) | Error (ppm) |
|----------------------------|--------------------------|----------------------------------------------------|------------|-------------|-------------|
| 298,0747                   | [M+H] <sup>+</sup>       | C <sub>16</sub> H <sub>12</sub> ClN <sub>3</sub> O | 298,0743   | 0,4         | 1           |

### Espectros de Masas

Especie iónica [M+H]<sup>+</sup>

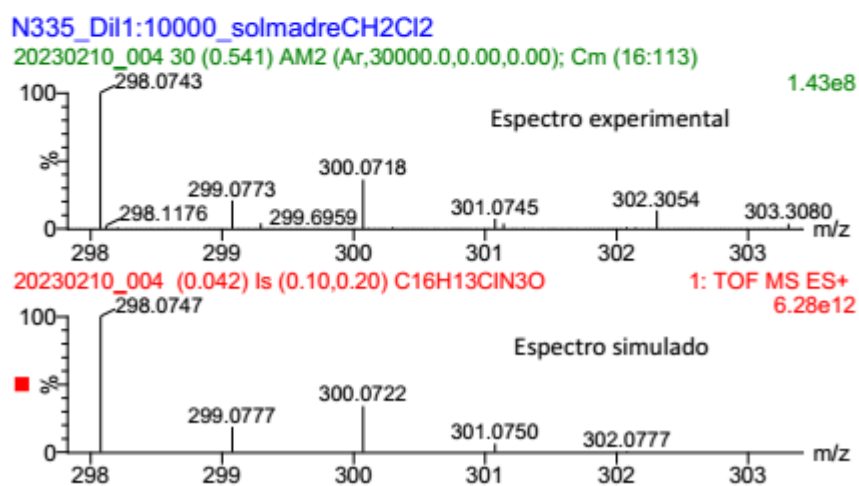

**Figure S18:** HRMS spectrum of compound **1j**

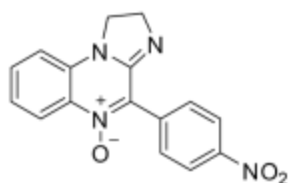

| $m/z$ experimental | Especie iónica detectada | Fórmula molecular de M                                        | $m/z$    | Error (mDa) | Error (ppm) |
|--------------------|--------------------------|---------------------------------------------------------------|----------|-------------|-------------|
| 309,0985           | [M+H] <sup>+</sup>       | C <sub>16</sub> H <sub>12</sub> N <sub>4</sub> O <sub>3</sub> | 309,0988 | 0,3         | 1           |

### Espectros de Masas

Especie iónica [M+H]<sup>+</sup>

NK 1-6\_Dil1:10000\_solmadreCH2Cl2

20230210\_005 27 (0.490) AM2 (Ar,30000.0,0.00,0.00); Cm (13:113)

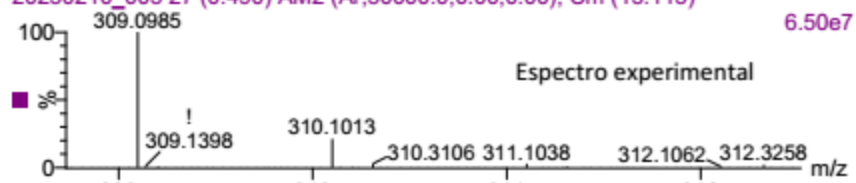

20230210\_005 (0.042) Is (0.10,0.20) C<sub>16</sub>H<sub>13</sub>N<sub>4</sub>O<sub>3</sub>

1: TOF MS ES+  
8.22e12

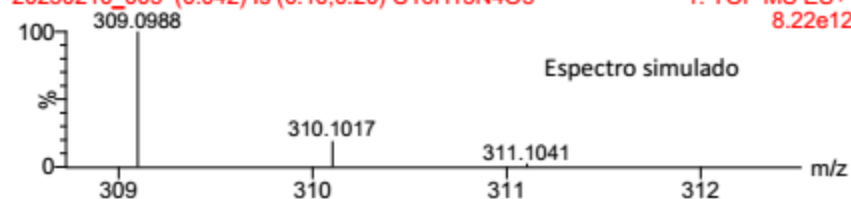

Figure S19: HRMS spectrum of compound **1k**



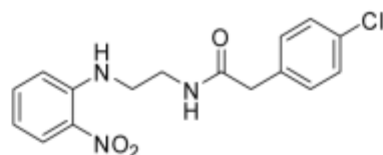

| $m/z$ experimental | Especie iónica detectada | Fórmula molecular de M                                          | $m/z$    | Error (mDa) | Error (ppm) |
|--------------------|--------------------------|-----------------------------------------------------------------|----------|-------------|-------------|
| 334,0957           | [M+H] <sup>+</sup>       | C <sub>16</sub> H <sub>16</sub> ClN <sub>3</sub> O <sub>3</sub> | 334,0959 | 0,2         | 1           |
| 356,0776           | [M+Na] <sup>+</sup>      |                                                                 | 334,0778 | 0,2         | 1           |

### Espectros de Masas

Especie iónica [M+H]<sup>+</sup>

N332\_Dil1:10000\_solmadreCH2Cl2

20230210\_006 30 (0.541) AM2 (Ar,30000.0,0.00,0.00); Cm (13:113)

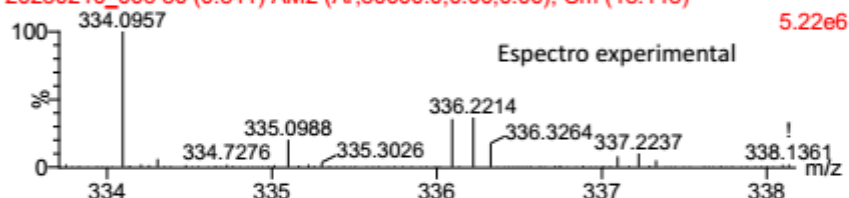

20230210\_006 (0.042) Is (0.10,0.20) C<sub>16</sub>H<sub>17</sub>ClN<sub>3</sub>O<sub>3</sub>

1: TOF MS ES+  
6.25e12

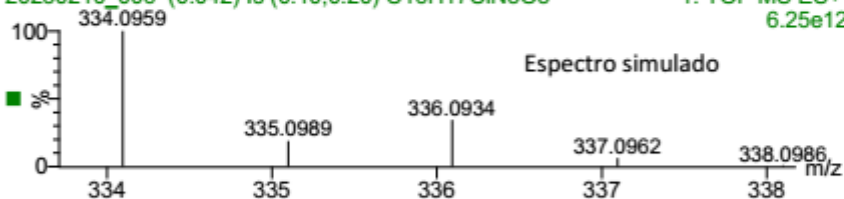

Especie iónica [M+Na]<sup>+</sup>

N332\_Dil1:10000\_solmadreCH2Cl2

20230210\_006 30 (0.541) AM2 (Ar,30000.0,0.00,0.00); Cm (11:110)

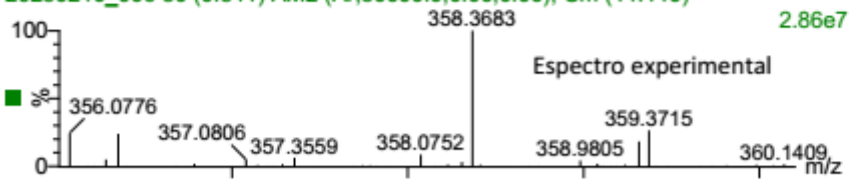

20230210\_006 (0.042) Is (0.10,0.20) C<sub>16</sub>H<sub>16</sub>ClN<sub>3</sub>O<sub>3</sub>Na

1: TOF MS ES+  
6.25e12

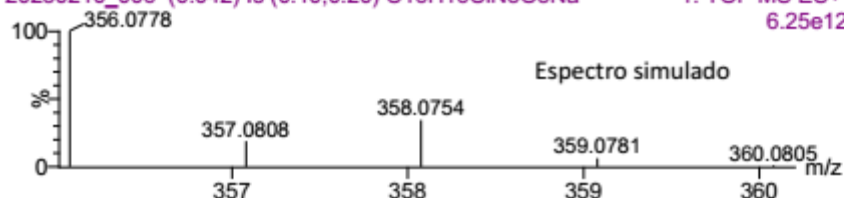

Figure S20: HRMS spectrum of compound 3j

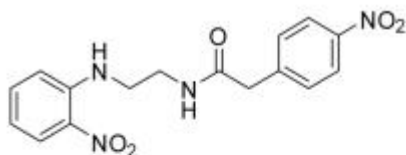

| <i>m/z</i> experimental | Especie iónica detectada | Fórmula molecular de M                                        | <i>m/z</i> | Error (mDa) | Error (ppm) |
|-------------------------|--------------------------|---------------------------------------------------------------|------------|-------------|-------------|
| 345,1204                | [M+H] <sup>+</sup>       | C <sub>16</sub> H <sub>16</sub> N <sub>4</sub> O <sub>5</sub> | 345,1199   | 0,5         | 1           |

### Espectros de Masas

Especie iónica [M+H]<sup>+</sup>

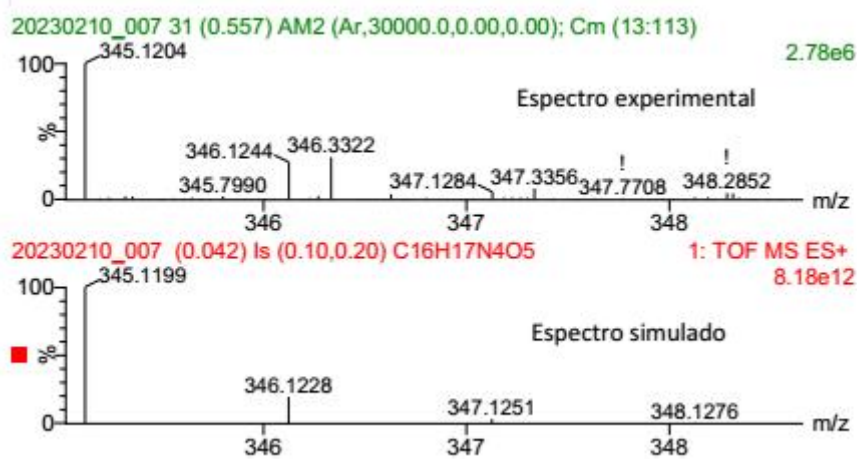

Figure S21: HRMS spectrum of compound **3k**

**Servicio de Análisis Elemental**

MA-20230719-172/II02

Análisis de C, H, N y S sobre muestras sólidas solicitado por, y rotuladas por:

**Dra. Liliana Orelli  
(Nadia Gruber)**

Sustancia Patrón utilizada para la determinación de C, H, N y S: Sulfanilamida

Estandar Muestra utilizada en la determinación de C, H, N y S: Acido sulfanílico

| # INQUIMAE | MUESTRA                                | N (%) | C (%) | H (%) | S (%) |
|------------|----------------------------------------|-------|-------|-------|-------|
| #10139     | <b>N377</b>                            | 14,1  | 64,8  | 4,1   | ND    |
| #10140     | <b>N379</b>                            | 17,7  | 61,4  | 3,9   | ND    |
|            | Patrón de Acido sulfanílico            | 8,09  | 41,61 | 4,07  | 18,56 |
|            | Ensayo de Control de Acido sulfanílico | 8,0   | 41,8  | 4,3   | 18,4  |

ND: No detectado.

NOTA: El error típico para CHNS es  $\pm 0,2\%$ .

El Análisis Elemental de CHNS se realizó en un equipo Carlo Erba EA 1108. Para el análisis se produce la combustión de la muestra en un tubo reactor donde los elementos a analizar son convertidos en CO<sub>2</sub>, H<sub>2</sub>O, N<sub>2</sub> y SO<sub>2</sub>. La separación de los gases resultantes se realiza por cromatografía gaseosa con columna de porapac de longitud variable y para la detección se utiliza un detector de conductividad térmica. El método requiere una calibración previa con sustancia patrón de composición conocida.

Buenos Aires, 19 de Julio de 2023.
